# Supplementary material for: Identifying information literacy skills and behaviors in the curricular competencies of health professions
Source: PubMed Central journal article supplement (PMC7441914; doi:10.5195/jmla.2020.833), 2020-07-01
Supplement: jmla-108-3-463-s01.pdf [file jmla-108-3-463-s01.pdf]

# Identifying information literacy skills and behaviors in the curricular competencies of health professions

Micah J. Waltz; Heather K. Moberly, AHIP; Esther E. Carrigan, AHIP

## APPENDIX A

### Texas A&M University College of Medicine: Competency based learning objectives

The screenshot shows the website for the Texas A&M University College of Medicine. The main heading is "Competency Based Learning Objectives". Below this, there are two main sections: "Medical Knowledge" and "Patient Care". Each section includes a description of the competency, "Institutional Learning Objectives", and a list of specific objectives (MK1-MK6 for Medical Knowledge, PC1-PC4 for Patient Care). A sidebar on the right contains a navigation menu with items like "Curriculum Support", "Information for Visiting Students", "Competency Based Learning Objectives", "Patient Encounter and Procedure Information", "Course Creation Information", "Student Forms", "Rotations", "Student Initiated Electives", "Objectively Structured Clinical Examination (OSCE)", "Curriculum Overview", and "Foundations and Organ Systems".

**Medical Knowledge**

Medical students must demonstrate knowledge of established and evolving biomedical, clinical, and psychosocial sciences and their application to patient care.

**Institutional Learning Objectives**  
 Upon completion of the medical school curriculum, our students will be able to:

- MK1 Demonstrate knowledge of normal human structure and function at the organ-system, tissue, cellular and molecular level; and of the interaction of human systems in maintaining homeostasis
- MK2 Describe the basic mechanisms involved in the causation of human disease and their influence on clinical presentation and therapy
- MK3 Demonstrate an understanding of how healthy lifestyles, psychosocial factors, and behavioral factors influence health
- MK4 Apply evidenced-based methods to clinical problem solving
- MK5 Demonstrate an understanding of the epidemiology of common diseases within a population and the approaches which are useful in reducing their incidence and prevalence
- MK6 Demonstrate knowledge of common societal problems such as domestic violence and substance abuse, including diagnosis, prevention, reporting, and treatment

**Patient Care**

Medical students must be able to provide appropriate, compassionate patient care for the promotion of health and treatment of health problems across the human life span.

**Institutional Learning Objectives**  
 Upon completion of the medical school curriculum, our students will be able to:

- PC1 Obtain both complete and system-focused medical histories that include psychosocial and behavioral determinants of health
- PC2 Perform both complete and system-focused physical examinations
- PC3 Develop appropriate differential diagnoses by integrating collected clinical information
- PC4 Develop contextual and individualized diagnostic and treatment plans based upon collected clinical information

|      |                                                                                                                                                                                                                                             |
|------|---------------------------------------------------------------------------------------------------------------------------------------------------------------------------------------------------------------------------------------------|
| PC5  | Interpret the results of commonly used laboratory and radiologic studies                                                                                                                                                                    |
| PC6  | Recognize common immediately life-threatening conditions and initiate therapy                                                                                                                                                               |
| PC7  | Formulate an initial management plan for critically ill patients                                                                                                                                                                            |
| PC8  | Demonstrate an understanding of the principles involved in the care of patients across the spectrum of the human life cycle                                                                                                                 |
| PC9  | Perform technical procedures including: venipuncture and arterial puncture; insertion of intravenous, central venous, and urethral catheters; insertion of a nasogastric tube; lumbar puncture; basic suturing; and basic airway management |
| PC10 | Discuss the principles of pain management and formulate a basic multidisciplinary care plan                                                                                                                                                 |
| PC11 | Assist in the provision of appropriate end-of-life care within a multidisciplinary team                                                                                                                                                     |
| PC12 | Educate patients in personalized health maintenance                                                                                                                                                                                         |
| PC13 | Perform basic health risk assessment and formulate appropriate screening plans                                                                                                                                                              |
| PC14 | Properly utilize clinical, laboratory, radiologic, and pathologic examinations to diagnose and treat common maladies                                                                                                                        |
| PC15 | Formulate preventive, curative, rehabilitative, and palliative therapeutic strategies for common disorders                                                                                                                                  |

## Interpersonal and Communication Skills

Medical students must demonstrate interpersonal and communication skills that result in the effective and respectful exchange of information and collaboration with patients, patients' family members, and health professionals across a broad range of socioeconomic and cultural backgrounds.

### Institutional Learning Objectives

Upon completion of the medical school curriculum, our students will be able to:

|      |                                                                                                                                                     |
|------|-----------------------------------------------------------------------------------------------------------------------------------------------------|
| ICS1 | Demonstrate effective listening skills                                                                                                              |
| ICS2 | Discuss diagnostic and treatment options in a manner comprehensible to the patient                                                                  |
| ICS3 | Communicate effectively with patients, patients' family members, peers, and other members of the health care team                                   |
| ICS4 | Educate patients, patients' family members, peers, and other members of the health care team at an appropriate level using appropriate technologies |
| ICS5 | Maintain accurate medical records                                                                                                                   |

## Professionalism

Medical students must demonstrate a commitment to professional responsibilities, adherence to ethical behaviors, and sensitivity to a diverse patient population.

### Institutional Learning Objectives

Upon completion of the medical school curriculum, our students will be able to:

|       |                                                                                                           |
|-------|-----------------------------------------------------------------------------------------------------------|
| PROF1 | Demonstrate an understanding of legal and ethical principles governing the physician-patient relationship |
| PROF2 | Display honesty, integrity and ethical behavior                                                           |

|        |                                                                                                                                                                                                       |
|--------|-------------------------------------------------------------------------------------------------------------------------------------------------------------------------------------------------------|
| PROF3  | Act in the patient's best interest and serve as a patient advocate                                                                                                                                    |
| PROF4  | Treat patients and patients' family members respectfully and compassionately, regardless of age, disability, gender, race, ethnicity, culture, religion, sexual preference, and socio-economic status |
| PROF5  | Respect the privacy of patients                                                                                                                                                                       |
| PROF6  | Work with other health professionals in a collaborative fashion                                                                                                                                       |
| PROF7  | Demonstrate an awareness of leadership roles in medicine and society                                                                                                                                  |
| PROF8  | Recognize potential conflicts of interest and demonstrate awareness of appropriate courses of action                                                                                                  |
| PROF9  | Demonstrate an understanding of peer review and the expectations of professional licensing boards, including medical jurisprudence                                                                    |
| PROF10 | Demonstrate knowledge of responsibilities to patients, peers, and other members of the health care team                                                                                               |
| PROF11 | Respond to conflicts in a professional manner                                                                                                                                                         |
| PROF12 | Project a professional image in demeanor and personal appearance                                                                                                                                      |

## Systems-Based Practice

Medical students must demonstrate an awareness of the larger context and system of health care and their impact on patient care.

### Institutional Learning Objectives

Upon completion of the medical school curriculum, our students will be able to:

|      |                                                                                                                                                                                                     |
|------|-----------------------------------------------------------------------------------------------------------------------------------------------------------------------------------------------------|
| SBP1 | Apply knowledge of health care systems to improve and optimize patient care                                                                                                                         |
| SBP2 | Advocate for continuous quality improvement in patient care and patient safety                                                                                                                      |
| SBP3 | Demonstrate an understanding of cost containment principles and their application in the delivery of health care                                                                                    |
| SBP4 | Demonstrate an understanding of the legal and regulatory frameworks governing the practice of medicine which affect payment, reimbursement, referrals and incentives                                |
| SBP5 | Recognize various approaches to the organization, financing, and delivery of health care                                                                                                            |
| SBP6 | Utilize information technology in providing medical care for individuals                                                                                                                            |
| SBP7 | Recognize health care system deficiencies regarding social needs, access to care issues, and health disparities when they arise and develop strategies for optimal care of each individual patient. |

## Practice-Based Learning and Improvement

Medical students must demonstrate the ability to investigate and evaluate their care of patients, to appraise and assimilate scientific evidence, and to continuously improve their patient care skills based on self-evaluation and life-long learning.

### Institutional Learning Objectives

Upon completion of the medical school curriculum, our students will be able to:

|  |
|--|
|  |
|--|

|      |                                                                                                                                                  |
|------|--------------------------------------------------------------------------------------------------------------------------------------------------|
| PBL1 | Identify and rectify deficiencies in their knowledge base and skill set                                                                          |
| PBL2 | Incorporate formative feedback into personal performance                                                                                         |
| PBL3 | Accomplish learning and improvement goals with appropriate self-directed activities                                                              |
| PBL4 | Utilize information resources and available data to support life-long learning                                                                   |
| PBL5 | Select, appraise, and utilize evidence from scientific studies related to clinical questions and patients' health problems                       |
| PBL6 | Demonstrate an understanding of the basic principles and importance of scholarly activity and Translational Research in the practice of medicine |

## Cultural Competence

Medical students should have the capacity to function effectively as a individual within the context of the cultural beliefs, practices, and needs presented by patients and their communities.

### Institutional Learning Objectives

Upon completion of the medical school curriculum, our students will be able to:

|     |                                                                                                                                                                                |
|-----|--------------------------------------------------------------------------------------------------------------------------------------------------------------------------------|
| CC1 | Demonstrate an understanding of the manner in which diverse cultures and belief systems perceive health and illness and respond to various symptoms, diseases, and treatments. |
| CC2 | Recognize and appropriately address gender and cultural biases in themselves, in others, and in the process of health care delivery.                                           |

## Quick Links

[Texas A&M Physicians](#)

[Howdy](#)

[Email](#)

[Blackboard](#)

[Medical Sciences Library](#)

[Incident & Accident Reporting](#)

[Centers & Institutes](#)

[Wellness with a Purpose](#)

[Dean & Leadership](#)

[Policies](#)

[Campus Maps](#)

[Veterans](#)

[Clinical Partners](#)

## Information Affiliations

[Contact Us](#)

[FAQs](#)

[Press & Media](#)

[Contact Webmaster](#)

[IT Help Desk](#)

[HSC Alert](#)

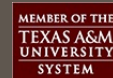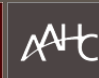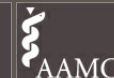

Texas A&M College of Medicine  
 3050 Health Professions Education Building  
 8447 Riverside Pkwy  
 Bryan, TX 77807  
 979-436-0200 | 979-436-0092
