# Supplementary material for: Identifying information literacy skills and behaviors in the curricular competencies of health professions
Source: PubMed Central journal article supplement (PMC7441914; doi:10.5195/jmla.2020.833), 2020-07-01
Supplement: jmla-108-3-463-s02.pdf [file jmla-108-3-463-s02.pdf]

# Identifying information literacy skills and behaviors in the curricular competencies of health professions

Micah J. Waltz; Heather K. Moberly, AHIP; Esther E. Carrigan, AHIP

## APPENDIX B

### Texas A&M University College of Nursing: Graduate student learning outcomes

The screenshot shows the website for the Texas A&M University College of Nursing. At the top, there is a navigation bar with links for TAMHSC, DENTISTRY, MEDICINE, PHARMACY, and PUBLIC HEALTH, along with a search box. Below this is the college's logo and name: "NURSING TEXAS A&M UNIVERSITY". A secondary navigation bar includes links for About, Contact, Future Students, Current Students, Alumni, Faculty & Staff, Administration, Research, and Giving.

The main content area features a large heading: "Graduate Student Learning Outcomes". Below this, a breadcrumb trail reads: "Home » Future » Graduate Student Learning Outcomes".

The first section is titled "Expected Student Outcomes: MSN-Education". It states: "At the completion of the MSN, graduates of the College of Nursing will be prepared to:" followed by a list of 9 outcomes:

1. Integrate scientific findings from nursing, biophysical science, genetics, public health, quality improvement and organizational sciences for the continual improvement of nursing care across diverse settings.
2. Utilize organizational and systems leadership in developing working relationships and making ethical and critical decisions to promote quality and safe care.
3. Apply principles, methods and tools of quality improvement within an organization to promote quality care.
4. Work as a change agent to apply and disseminate research outcomes within the practice setting.
5. Use patient care and communication technologies to enhance patient care.
6. Intervene at the system level to develop and implement policies that influence health care.
7. Collaborate with other health care professionals to manage and coordinate care.
8. Integrate organizational, client centered and culturally centered approaches to plan, deliver and evaluate health care for individuals, families and populations.
9. Influence health care outcomes by integrating advanced knowledge into direct and indirect care.

The second section is titled "Expected Student Outcomes: MSN-Family Nurse Practitioner". It states: "At the completion of the MSN, graduates of the College of Nursing will be prepared to:" followed by a list of 3 outcomes:

1. Conduct a comprehensive and systematic assessment of health and illness incorporating ethical, diverse and culturally sensitive approaches.
2. Design, implement and evaluate therapeutic and preventative interventions based on nursing science, and other sciences and humanities.
3. Develop and sustain therapeutic relationships and partnerships with individuals, families or populations.

On the right side of the page, there is a sidebar menu with a top navigation bar containing "Howdy", "Directory", "Maps", "Jobs", "Email", and "IT". The sidebar menu includes the following items:

- Future Students
- Additional Program Information
- Essential Competency Requirements
- Criminal Background Check
- Excess Credit Hour Guideline
- Laptop Requirement
- Admissions Assessment Exam
- International Applicants
- Baccalaureate Student Learning Outcomes
- FAQs
- Graduate Student Learning Outcomes (highlighted)

- evidence-based care to improve patient outcomes.
- 6. Demonstrate organizational and systems leadership in the provision of quality and safe patient care.
- 7. Integrate principles of quality improvement, informatics and current and emerging technologies to optimize patient outcomes.
- 8. Guide, mentor and support nurses and others to achieve excellence in patient care.
- 9. Educate and guide individuals and groups in health-related transitions throughout the lifespan.
- 10. Analyze the links among practice, organizational, population, fiscal and policy issues to advocate for improved patient outcomes.

## Quick Links

- |                                   |                                    |
|-----------------------------------|------------------------------------|
| <a href="#">Email</a>             | <a href="#">Maps</a>               |
| <a href="#">Directory</a>         | <a href="#">Calendar</a>           |
| <a href="#">About the College</a> | <a href="#">Blackboard eCampus</a> |
| <a href="#">Leadership</a>        | <a href="#">Med Sci Library</a>    |
| <a href="#">Faculty Bios</a>      | <a href="#">Student Orgs</a>       |
| <a href="#">Room Scheduling</a>   | <a href="#">Howdy</a>              |
| <a href="#">Jobs</a>              |                                    |

## Information Affiliations

- [Contact Us](#)
- [FAQs](#)
- [Press & Media](#)
- [IT Help Desk](#)
- [Incident & Accident Reporting](#)
- [HSC Alert](#)

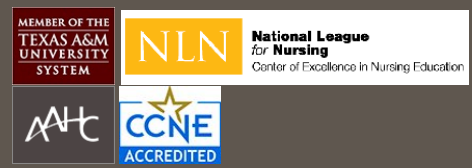

The baccalaureate and the master's degrees in nursing at the Texas A&M University College of Nursing are accredited by the Commission on Collegiate Nursing Education.
