# Supplementary material for: Identifying information literacy skills and behaviors in the curricular competencies of health professions
Source: PubMed Central journal article supplement (PMC7441914; doi:10.5195/jmla.2020.833), 2020-07-01
Supplement: jmla-108-3-463-s03.pdf [file jmla-108-3-463-s03.pdf]

## Identifying information literacy skills and behaviors in the curricular competencies of health professions

Micah J. Waltz; Heather K. Moberly, AHIP; Esther E. Carrigan, AHIP

### APPENDIX C

Texas A&M University College of Veterinary Medicine & Biomedical Sciences: New graduate outcomes & competency rubrics

## New Graduate Outcomes & Competency Rubrics

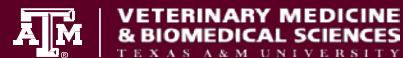

### NGO 1:

Comprehensive patient diagnosis (problem-solving skills), appropriate use of clinical laboratory testing, and record management

---

### NGO 2:

Comprehensive treatment planning, including patient referral when indicated

---

### NGO 3:

Anesthesia and pain management, patient welfare

---

### NGO 4:

Basic surgery skills, experience, and case management

---

### NGO 5:

Basic medicine skills, experience, and case management

---

### NGO 6:

Emergency and intensive care case management

---

### NGO 7:

Health promotion, disease prevention/biosecurity, zoonosis, and food safety

---

### NGO 8:

Client communications and ethical conduct

---

### NGO 9:

Critical analysis of new information and research findings relevant to veterinary medicine

---

### NGO 10:

Team collaboration, leadership, and practice management

---

### NGO 11:

Multicultural awareness and personal wellness

---

### NGO 12:

Legal and regulatory compliance

---

### NGO 13:

Animal welfare

---

## NGO 1: Comprehensive patient diagnosis (problem-solving skills), appropriate use of clinical laboratory testing, and record management

**1.1** The graduate will obtain patient signalment, history, and physical examination and formulate a problem list and differential diagnoses based upon their findings for individual or groups of common domestic species.

**\*\* This rubric defines competencies for each NGO that students should complete in each year of the curriculum\*\***

| Competency Rubric for each Year of the Curriculum                                                                                                                                                                         | 1VM                                                                                                                                                                                                                                                                                                                                                                                                                                                                    | 2VM                                                                                                                                                                                                                                                                                                                                                                                                                                                                                           | 3VM                                                                                                                                                                                                                                                            | 4VM                                                                                                                                                                                                                                                            |
|---------------------------------------------------------------------------------------------------------------------------------------------------------------------------------------------------------------------------|------------------------------------------------------------------------------------------------------------------------------------------------------------------------------------------------------------------------------------------------------------------------------------------------------------------------------------------------------------------------------------------------------------------------------------------------------------------------|-----------------------------------------------------------------------------------------------------------------------------------------------------------------------------------------------------------------------------------------------------------------------------------------------------------------------------------------------------------------------------------------------------------------------------------------------------------------------------------------------|----------------------------------------------------------------------------------------------------------------------------------------------------------------------------------------------------------------------------------------------------------------|----------------------------------------------------------------------------------------------------------------------------------------------------------------------------------------------------------------------------------------------------------------|
|                                                                                                                                                                                                                           | <i>Level of competence following completion of year 1.</i>                                                                                                                                                                                                                                                                                                                                                                                                             | <i>Level of competence following completion of year 2.</i>                                                                                                                                                                                                                                                                                                                                                                                                                                    | <i>Level of competence following completion of year 3.</i>                                                                                                                                                                                                     | <i>Expected level of competence at graduation.</i>                                                                                                                                                                                                             |
| <p><b>1.1</b><br/>Obtain patient signalment, history, and physical examination and formulate a problem list and differential diagnoses based upon their findings for individual or groups of common domestic species.</p> | <p><b>1A.</b> define signalment and obtain a complete history for common domestic species</p> <p><b>1B.</b> perform complete physical examination of all body systems on common domestic species</p> <p><b>1C.</b> obtain history for a herd/group environment</p> <p><b>1D.</b> differentiate normal from abnormal patient findings</p> <p><b>1E.</b> develop a problem list using appropriate medical terminology based on signalment, history and physical exam</p> | <p><b>2A.</b> interpret focused history to identify body system(s) involved etiopathogenesis</p> <p><b>2B.</b> differentiate normal from abnormal physical exam parameters</p> <p><b>2C.</b> perform physical examination on core species in clinical scenario</p> <p><b>2D.</b> develop a problem list using appropriate medical terminology based on signalment, history and physical exam scenarios</p> <p><b>2E.</b> create a differential diagnosis list at the level of body system</p> | <p><b>3A.</b> obtain patient signalment, history, and perform and interpret physical examination in a clinical scenario</p> <p><b>3B.</b> formulate a prioritized problem list and differential diagnoses based upon their findings in a clinical scenario</p> | <p><b>4A.</b> Obtain patient signalment, history, and perform and interpret a physical examination in a clinical patient</p> <p><b>4B.</b> formulate a prioritized problem list and differential diagnoses based upon their findings for clinical patients</p> |

Examples of session-level/meeting-level/unit-level outcomes to use as a guide to fulfill **NGO 1.1**:

- use knowledge of anatomy and physiology to perform a complete systematic physical examination of all body systems, distinguishing normal and abnormal findings,
- obtain a signalment and complete history to collect relevant information about the patient(s),
- develop an accurate and complete problem list, based on the history and physical examination, and use semantic qualifiers to develop a concise patient problem statement,
- list and describe the common and significant diseases that are developmental, degenerative, metabolic, nutritional, neoplastic, infectious, immune mediated, toxic, and traumatic in nature for each of the common domestic species,
- develop a preliminary differential diagnosis list, based on the history and physical examination of the patient(s), apply clinical reasoning skills to rank the possible medical conditions from most likely to least likely.

**1.2** The graduate will construct an appropriate diagnostic plan, based upon their preliminary differential diagnosis list, and analyze the findings in order to reach a presumptive diagnosis of common medical conditions in common domestic species.

**\*\* This rubric defines competencies for each NGO that students should complete in each year of the curriculum\*\***

| Competency Rubric for each Year of the Curriculum                                                                                                                                                                                                     | 1VM                                                                                                                                                                                  | 2VM                                                                                                                                                                                                                                                                                                                                                         | 3VM                                                                                                                                                                                                                                                                                                                                                                                                                                                                                                                       | 4VM                                                                                                                                                                                                                                                                                                                                                                                                                                                                                                                                              |
|-------------------------------------------------------------------------------------------------------------------------------------------------------------------------------------------------------------------------------------------------------|--------------------------------------------------------------------------------------------------------------------------------------------------------------------------------------|-------------------------------------------------------------------------------------------------------------------------------------------------------------------------------------------------------------------------------------------------------------------------------------------------------------------------------------------------------------|---------------------------------------------------------------------------------------------------------------------------------------------------------------------------------------------------------------------------------------------------------------------------------------------------------------------------------------------------------------------------------------------------------------------------------------------------------------------------------------------------------------------------|--------------------------------------------------------------------------------------------------------------------------------------------------------------------------------------------------------------------------------------------------------------------------------------------------------------------------------------------------------------------------------------------------------------------------------------------------------------------------------------------------------------------------------------------------|
|                                                                                                                                                                                                                                                       | <i>Level of competence following completion of year 1.</i>                                                                                                                           | <i>Level of competence following completion of year 2.</i>                                                                                                                                                                                                                                                                                                  | <i>Level of competence following completion of year 3.</i>                                                                                                                                                                                                                                                                                                                                                                                                                                                                | <i>Expected level of competence at graduation.</i>                                                                                                                                                                                                                                                                                                                                                                                                                                                                                               |
| <p><b>1.2</b><br/>Construct an appropriate diagnostic plan, based upon their preliminary differential diagnosis list, and analyze the findings in order to reach a presumptive diagnosis of common medical conditions in common domestic species.</p> | <p><b>1A. match</b> core diagnostic tests to appropriate body system(s) and appropriate sample</p> <p><b>1B. perform</b> core diagnostic tests and <b>interpret</b> test results</p> | <p><b>2A. match</b> available diagnostic tests to differential diagnosis list</p> <p><b>2B. prioritize</b> available diagnostic tests based on their benefits and risks</p> <p><b>2C. perform</b> and <b>interpret</b> core diagnostic tests</p> <p><b>2D. communicate</b> diagnostic plan with associated risks to stakeholders in a clinical scenario</p> | <p><b>3A. construct</b> an appropriate diagnostic plan(s), based upon their preliminary differential diagnosis list in a clinical scenario</p> <p><b>3B. analyze</b> diagnostic findings in order to reach a presumptive diagnosis of common medical conditions in a clinical scenario</p> <p><b>3C. evaluate</b> available diagnostic tests and identify benefits, risks, costs and client constraints in a clinical scenario</p> <p><b>3D. communicate</b> diagnostic plan with stakeholders in a clinical scenario</p> | <p><b>4A. construct</b> an appropriate diagnostic plan, based upon their preliminary differential diagnosis list and client constraints for a clinical patient</p> <p><b>4B. analyze</b> diagnostic findings in order to reach a presumptive diagnosis of common medical conditions in clinical patients</p> <p><b>4C. evaluate</b> available diagnostic tests and identify benefits, risks, costs and client/patient constraints in a clinical patient</p> <p><b>4D. communicate</b> diagnostic plan with stakeholders on clinical patients</p> |

Examples of session-level/meeting-level/unit-level outcomes to use as a guide to fulfill **NGO 1.2**:

- **explain** the pathophysiology that may occur in the major organ systems for each of the common and significant diseases,
- **identify** appropriate diagnostic tests and procedures in order to rule in or rule out medical conditions based on the preliminary differential diagnosis list,
- **weigh** the potential benefits and risks of performing diagnostic tests on the patient, as well as **recognizing** any client financial constraints, in order to **develop** a definitive diagnostic plan,
- **perform** diagnostic tests and procedures, **interpret** the laboratory data and other test results, and accurately **apply** this information in order to determine an accurate diagnosis for common medical conditions.

**1.3** The graduate will prepare a medical record, documenting all relevant client and patient information, and communicate effectively with the animal health care team using the medical record.

**\*\* This rubric defines competencies for each NGO that students should complete in each year of the curriculum \*\***

| Competency Rubric for each Year of the Curriculum                                                                                                                                   | 1VM                                                                                                                                                                                                                                  | 2VM                                                                                                                                            | 3VM                                                                                                                                                                                                                          | 4VM                                                                                                                                                                                                                       |
|-------------------------------------------------------------------------------------------------------------------------------------------------------------------------------------|--------------------------------------------------------------------------------------------------------------------------------------------------------------------------------------------------------------------------------------|------------------------------------------------------------------------------------------------------------------------------------------------|------------------------------------------------------------------------------------------------------------------------------------------------------------------------------------------------------------------------------|---------------------------------------------------------------------------------------------------------------------------------------------------------------------------------------------------------------------------|
|                                                                                                                                                                                     | <i>Level of competence following completion of year 1.</i>                                                                                                                                                                           | <i>Level of competence following completion of year 2.</i>                                                                                     | <i>Level of competence following completion of year 3.</i>                                                                                                                                                                   | <i>Expected level of competence at graduation.</i>                                                                                                                                                                        |
| <p><b>1.3</b><br/>Prepare a medical record, documenting all relevant client and patient information, and communicate with the animal health care team using the medical record.</p> | <p><b>1A.</b> define the components of a complete medical record using a standardized SOAP format</p> <p><b>1B.</b> prepare a medical record (SO)</p> <p><b>1C.</b> explain the legal and regulatory aspects of a medical record</p> | <p><b>2A.</b> evaluate and assess a medical record for completeness and legal compliance</p> <p><b>2B.</b> prepare a medical record (SOAP)</p> | <p><b>3A.</b> create a medical record (SOAP) that complies with legal requirements in a clinical scenario</p> <p><b>3B.</b> communicate with the animal health care team using the medical record in a clinical scenario</p> | <p><b>4A.</b> prepare a medical record (SOAP), documenting all relevant client and patient information</p> <p><b>4B.</b> communicate with the animal health care team using the medical record for a clinical patient</p> |

Examples of session-level/meeting-level/unit-level outcomes to use as a guide to fulfill **NGO 1.3**:

- prepare a medical record that concisely summarizes all relevant patient information, utilizing a standard veterinary medical format that is readily understood by the health care team,
- prepare a medical record that is legible, accurate, current, and conforms to all legal requirements.

## NGO 2: Comprehensive treatment planning, including patient referral when indicated

**2.1** The graduate will **formulate** a comprehensive therapeutic plan for medical and surgical problems based upon their diagnosis for common domestic species.

**\*\* This rubric defines competencies for each NGO that students should complete in each year of the curriculum\*\***

| Competency Rubric for each Year of the Curriculum                                                                                                          | 1VM                                                                    | 2VM                                                                                                                                                                                                                                    | 3VM                                                                                                                                                                                                                     | 4VM                                                                                                                                                                                                                                                                                                                       |
|------------------------------------------------------------------------------------------------------------------------------------------------------------|------------------------------------------------------------------------|----------------------------------------------------------------------------------------------------------------------------------------------------------------------------------------------------------------------------------------|-------------------------------------------------------------------------------------------------------------------------------------------------------------------------------------------------------------------------|---------------------------------------------------------------------------------------------------------------------------------------------------------------------------------------------------------------------------------------------------------------------------------------------------------------------------|
|                                                                                                                                                            | <i>Level of competence following completion of year 1.</i>             | <i>Level of competence following completion of year 2.</i>                                                                                                                                                                             | <i>Level of competence following completion of year 3.</i>                                                                                                                                                              | <i>Expected level of competence at graduation.</i>                                                                                                                                                                                                                                                                        |
| <p><b>2.1</b><br/>Formulate a comprehensive therapeutic plan for medical and surgical problems based upon their diagnosis for common domestic species.</p> | <p><b>1A. identify</b> the therapeutic plan as a component of SOAP</p> | <p><b>2A. investigate</b> and <b>evaluate</b> available therapeutic options for a given disease/diagnosis in terms of potential benefits and risks</p> <p><b>2B. evaluate</b> pre-formulated treatment plan in a clinical scenario</p> | <p><b>3A. formulate</b> multiple therapeutic plans for a clinical scenario, accounting for patient and client constraints</p> <p><b>3B. formulate</b> and <b>communicate</b> treatment plans in a clinical scenario</p> | <p><b>4A. formulate</b> comprehensive therapeutic plan including follow-up for medical and surgical problems in a clinical patient, accounting for patient and client constraints</p> <p><b>4B. communicate</b> treatment options for acute and follow-up care with client and healthcare team for a clinical patient</p> |

Examples of session-level/meeting-level/unit-level outcomes to use as a guide to fulfill **NGO 2.1**:

- **list** a range of potential therapeutic options for a given diagnosis,
- **weigh** the potential benefits and risks of the available therapeutic options and **consider** the feasibility of implementation, owner compliance, and the financial constraints of the client for a given patient,
- **formulate** a comprehensive therapeutic plan for medical and surgical problems based upon the diagnosis for common domestic species,
- **communicate** the therapeutic options to the client in a manner that is readily understood,
- **promotes** adherence to recommendations, and facilitates the selection of a treatment option.

**2.2 Evaluate** the scope of their personal and professional limits and appropriately **judge** when to seek professional advice, assistance, and support and manage a referral case.

**\*\* This rubric defines competencies for each NGO that students should complete in each year of the curriculum\*\***

| Competency Rubric for each Year of the Curriculum                                                                                                                                                       | 1VM                                                                                                                                                                                                                                                                                  | 2VM                                                                                                                                                                                                                                                                                                                        | 3VM                                                                                                                                                                                                                                                                                                                                                                                                  | 4VM                                                                                                                                                                                                                    |
|---------------------------------------------------------------------------------------------------------------------------------------------------------------------------------------------------------|--------------------------------------------------------------------------------------------------------------------------------------------------------------------------------------------------------------------------------------------------------------------------------------|----------------------------------------------------------------------------------------------------------------------------------------------------------------------------------------------------------------------------------------------------------------------------------------------------------------------------|------------------------------------------------------------------------------------------------------------------------------------------------------------------------------------------------------------------------------------------------------------------------------------------------------------------------------------------------------------------------------------------------------|------------------------------------------------------------------------------------------------------------------------------------------------------------------------------------------------------------------------|
|                                                                                                                                                                                                         | <i>Level of competence following completion of year 1.</i>                                                                                                                                                                                                                           | <i>Level of competence following completion of year 2.</i>                                                                                                                                                                                                                                                                 | <i>Level of competence following completion of year 3.</i>                                                                                                                                                                                                                                                                                                                                           | <i>Expected level of competence at graduation.</i>                                                                                                                                                                     |
| <p><b>2.2</b><br/>Evaluate the scope of their personal and professional limits and appropriately <b>judge</b> when to seek professional advice, assistance, and support and manage a referral case.</p> | <p><b>1A. apply</b> appropriate terminology when communicating with stakeholders</p> <p><b>1B. contrast</b> communication needs between DVM and Client</p> <p><b>1C. match and apply</b> terminology used in communication with different audience (ie, specialist DVM vs owner)</p> | <p><b>2A. differentiate</b> roles of general and referral practices in veterinary medicine</p> <p><b>2B. list and explain</b> requirements (equipment, cost, expertise, staff) necessary to perform a given diagnostic test or procedure</p> <p><b>2C. explain</b> referral process to a client in a clinical scenario</p> | <p><b>3A. identify</b> personal and professional strengths and limits as components of case management</p> <p><b>3B. identify</b> appropriate clinical scenarios in which to refer a patient</p> <p><b>3C. communicate</b> referral process, costs and expectations with the client in a clinical scenario</p> <p><b>3D. communicate</b> with referral practice personnel in a clinical scenario</p> | <p><b>4A. differentiate</b> clinical cases which require referral from general care in a clinical patient</p> <p><b>4B. manage</b> referral process and <b>communicate</b> with stakeholders throughout all stages</p> |

Examples of session-level/meeting-level/unit-level outcomes to use as a guide to fulfill **NGO 2.2**:

- **describe** the roles and responsibilities of referring and referral veterinarians and **explain** the importance of referral in providing optimal patient care,
- **judge** their level of expertise and **discriminate** between patients they are capable of treating and patients that require referral or other forms of assistance,
- **state** the requirements necessary to perform a given diagnostic test or procedure, including staff, equipment, expertise, and other relevant considerations,
- **communicate** with the owner and the referral veterinarian to coordinate patient care before, during, and after the referral, including preparing the medical records,
- **explain** the referral process, including selecting a referral DVM with appropriate expertise, preparing medical records, **communicating** with the referral veterinarian, and **communicating** with the owner, including providing recommendations for long-term care and recheck appointments.

## NGO 3: Anesthesia and pain management, patient welfare

**3.1** The graduate will recognize the need for sedation and anesthesia and evaluate the pertinent patient information in order to formulate an appropriate anesthesia protocol in common domestic species.

**\*\* This rubric defines competencies for each NGO that students should complete in each year of the curriculum\*\***

| Competency Rubric for each Year of the Curriculum                                                                                                                                                                   | 1VM                                                                                                                                                                                                                                           | 2VM                                                                                                                                                                                                                                                                                                                                                                                                                                                           | 3VM                                                                                                                                                                                                                                                                                                                                                 | 4VM                                                                                                                                                                                                                                                                                                                                          |
|---------------------------------------------------------------------------------------------------------------------------------------------------------------------------------------------------------------------|-----------------------------------------------------------------------------------------------------------------------------------------------------------------------------------------------------------------------------------------------|---------------------------------------------------------------------------------------------------------------------------------------------------------------------------------------------------------------------------------------------------------------------------------------------------------------------------------------------------------------------------------------------------------------------------------------------------------------|-----------------------------------------------------------------------------------------------------------------------------------------------------------------------------------------------------------------------------------------------------------------------------------------------------------------------------------------------------|----------------------------------------------------------------------------------------------------------------------------------------------------------------------------------------------------------------------------------------------------------------------------------------------------------------------------------------------|
|                                                                                                                                                                                                                     | <i>Level of competence following completion of year 1.</i>                                                                                                                                                                                    | <i>Level of competence following completion of year 2.</i>                                                                                                                                                                                                                                                                                                                                                                                                    | <i>Level of competence following completion of year 3.</i>                                                                                                                                                                                                                                                                                          | <i>Expected level of competence at graduation.</i>                                                                                                                                                                                                                                                                                           |
| <p><b>3.1</b><br/>Recognize the need for sedation, anesthesia and analgesia and evaluate the pertinent patient information in order to formulate an appropriate anesthesia protocol in common domestic species.</p> | <p><b>1A. identify</b> pathways of pain</p> <p><b>1B. recognize</b> legal and ethical responsibilities of sedation/anesthesia/analgesia</p> <p><b>1C. identify</b> the responsibility of the veterinarian to alleviate pain and suffering</p> | <p><b>2A. recognize</b> causes of pain and the need for sedation/anesthesia/analgesia</p> <p><b>2B. evaluate</b> healthy patient prior to sedation/anesthesia/analgesia in a clinical scenario</p> <p><b>2C. formulate</b> and justify sedation/anesthesia/analgesia protocol for a healthy patient in a clinical scenario</p> <p><b>2D. describe</b> considerations for co-morbidities on sedation/anesthesia/analgesia protocols in a clinical scenario</p> | <p><b>3A. recognize</b> pain in a patient in a clinical scenario and formulate a treatment plan</p> <p><b>3B. evaluate</b> patient prior to sedation/anesthesia/analgesia in a clinical scenario</p> <p><b>3C. formulate</b> and justify sedation/anesthesia protocol for healthy patients and those with co-morbidities in a clinical scenario</p> | <p><b>4A. recognize</b> pain and implement a treatment plan to address pain in a clinical patient</p> <p><b>4B. evaluate</b> clinical patient prior to sedation/anesthesia/analgesia</p> <p><b>4C. formulate</b> and justify sedation/anesthesia/analgesia protocol for a clinical patient, accounting for patient and owner constraints</p> |

Examples of session-level/meeting-level/unit-level outcomes to use as a guide to fulfill **NGO 3.1**:

- use knowledge of anatomy and physiology to evaluate the patient prior to formulating an anesthetic protocol,
- recognize clinical procedures likely to induce pain and recognize the responsibility of veterinarians to alleviate animal pain and suffering,
- state the indications and limitations of local and regional anesthetic techniques, short-and long-term injectable and inhalant anesthetic agents,
- classify common anesthetic and perianesthetic agents and explain their mechanisms of action, pharmacologic properties, and physiologic effects on the patient,
- evaluate pertinent patient information to formulate a safe and effective preanesthetic and anesthetic protocol for common procedures based on patient signalment, clinical examination findings, patient risk factors, financial considerations of the owner, and feasibility (e.g., equipment, personnel, competence),
- predict the expected degree of pain and employ an appropriate anesthetic protocol in order to adhere to appropriate standards of patient care with regard to the prevention and alleviation of pain.

**3.2** The graduate will **apply** an appropriate anesthesia protocol to induce, maintain, and recover patients from anesthesia following current veterinary medical standards for common domestic species.

**\*\* This rubric defines competencies for each NGO that students should complete in each year of the curriculum \*\***

| Competency Rubric for each Year of the Curriculum                                                                                                                                                    | 1VM                                                                                                                                                                        | 2VM                                                                                                                                                                                                                                            | 3VM                                                                                                                                           | 4VM                                                                                                                                            |
|------------------------------------------------------------------------------------------------------------------------------------------------------------------------------------------------------|----------------------------------------------------------------------------------------------------------------------------------------------------------------------------|------------------------------------------------------------------------------------------------------------------------------------------------------------------------------------------------------------------------------------------------|-----------------------------------------------------------------------------------------------------------------------------------------------|------------------------------------------------------------------------------------------------------------------------------------------------|
|                                                                                                                                                                                                      | <i>Level of competence following completion of year 1.</i>                                                                                                                 | <i>Level of competence following completion of year 2.</i>                                                                                                                                                                                     | <i>Level of competence following completion of year 3.</i>                                                                                    | <i>Expected level of competence at graduation.</i>                                                                                             |
| <p><b>3.2</b><br/>Apply an appropriate anesthesia protocol to induce, maintain, and recover patients from anesthesia following current veterinary medical standards for common domestic species.</p> | <p><b>1A. describe</b> ventilation and circulation in a healthy patient</p> <p><b>1B. describe</b> anatomy relevant to performing local and regional anesthetic blocks</p> | <p><b>2A. identify</b> benefits and risks of anesthesia in a clinical scenario</p> <p><b>2B. apply</b> anesthetic protocol in a clinical scenario</p> <p><b>2C. identify</b> the components and legal requirements of an anesthetic record</p> | <p><b>3A. apply</b> anesthetic protocol and maintain as needed in a clinical scenario</p> <p><b>3B. create</b> complete anesthetic record</p> | <p><b>4A. implement</b> an appropriate anesthesia protocol to induce, maintain, and recover patients from anesthesia in a clinical patient</p> |

Examples of session-level/meeting-level/unit-level outcomes to use as a guide to fulfill **NGO 3.2**:

- **locate** and **describe** the regional anatomy relevant to performing local and regional anesthetic techniques,
- **describe** the normal physiologic processes relevant to monitoring a patient during the anesthetic period,
- **recognize** the important legal and ethical responsibilities of veterinarians and their support staff with respect to roles and responsibilities during the induction, maintenance, and recovery of patients from anesthesia,
- **name** anesthetic equipment and monitoring devices that are commonly used during the induction, maintenance, and recovery of patients from anesthesia and **explain** the indications and limitations of each,
- **choose** and **operate** appropriate anesthetic equipment and monitoring devices that are commonly used to induce, maintain, and recover patients from anesthesia,
- **perform** local and regional anesthetic techniques and administer sedation and short- and long-term injectable and inhalant anesthetic agents safely and effectively,
- **name** common surgical procedures that can be performed under field conditions and **explain** the benefits, limitations, and risks of field anesthesia,
- **monitor** patients during the anesthetic period (i.e., before, during, and after surgery) and adjust and modify anesthetic protocols as needed to appropriately **manage** the patient,
- **identify** risks posed to patients and their handlers during the anesthetic period (i.e., before, during, and after surgery) and **employ** appropriate actions to reduce these risks and minimize potential patient complications.



**3.3** The graduate will **recognize** the clinical signs associated with pain in all common domestic species, **assess** the type of pain, **classify** the level of pain, **formulate** a pain management plan, and **apply** a therapy to effectively prevent and alleviate animal suffering and pain.

**\*\* This rubric defines competencies for each NGO that students should complete in each year of the curriculum\*\***

| Competency Rubric for each Year of the Curriculum                                                                                                                                                                                                                                                          | 1VM                                                                                                                                                                            | 2VM                                                                                                                                                                                                                                                      | 3VM                                                                                                                                                                                                        | 4VM                                                                                                                                                                                                                                                                                                                                                                        |
|------------------------------------------------------------------------------------------------------------------------------------------------------------------------------------------------------------------------------------------------------------------------------------------------------------|--------------------------------------------------------------------------------------------------------------------------------------------------------------------------------|----------------------------------------------------------------------------------------------------------------------------------------------------------------------------------------------------------------------------------------------------------|------------------------------------------------------------------------------------------------------------------------------------------------------------------------------------------------------------|----------------------------------------------------------------------------------------------------------------------------------------------------------------------------------------------------------------------------------------------------------------------------------------------------------------------------------------------------------------------------|
|                                                                                                                                                                                                                                                                                                            | <i>Level of competence following completion of year 1.</i>                                                                                                                     | <i>Level of competence following completion of year 2.</i>                                                                                                                                                                                               | <i>Level of competence following completion of year 3.</i>                                                                                                                                                 | <i>Expected level of competence at graduation.</i>                                                                                                                                                                                                                                                                                                                         |
| <p><b>3.3</b><br/> <b>Recognize</b> the clinical signs associated with pain in all common domestic species, <b>assess</b> the type of pain, <b>classify</b> the level of pain, <b>formulate</b> a pain management plan, and <b>apply</b> a therapy to prevent and alleviate animal suffering and pain.</p> | <p><b>1A. describe</b> pathophysiology of pain</p> <p><b>1B. recognize</b> the clinical signs of pain on a physical exam</p> <p><b>1C. describe</b> veterinary pain scales</p> | <p><b>2A. apply</b> pain scales in a clinical scenario</p> <p><b>2B. formulate and justify</b> pain management plan in a clinical scenario</p> <p><b>2C. communicate</b> a pain management plan to client and healthcare team in a clinical scenario</p> | <p><b>3A. formulate and justify</b> pain management plan in a clinical scenario, accounting for client and patient constraints</p> <p><b>3B. implement</b> pain management plan in a clinical scenario</p> | <p><b>4A. apply</b> pain scales in a clinical patient</p> <p><b>4B. formulate and justify</b> pain management plan in a clinical patient, accounting for client and patient constraints</p> <p><b>4C. implement</b> pain management plan in a clinical patient</p> <p><b>4D. communicate</b> pain management plan to client and healthcare team for a clinical patient</p> |

Examples of session-level/meeting-level/unit-level outcomes to use as a guide to fulfill **NGO 3.3**:

- **explain** the physiology of pain and **apply** knowledge of anatomy to **recognize** the clinical signs associated with pain in all common domestic species,
- **explain** the role of pain recognition scales in evaluating patients for pain and be able to **apply** those pain scales to common domestic species,
- **recognize** the need for pharmacologic, multimodal, and alternative therapies to address patient pain,
- **list** the classes of drugs that can be used to control pain, **describe** their mechanism of action, and **describe** the adverse reactions that may occur as a result of these actions,
- **construct** a pain management plan that matches the type and level of pain being experienced by the patient with the appropriate class, dose, and route of administration of drug to effectively alleviate the pain,
- **weigh** the benefits of pain management against the potential complications of pharmaceutical intervention when developing a pain management plan,
- **implement** a comprehensive pain management plan and **communicate** long-term monitoring and treatment schemes with members of the health care team and owners.

## NGO 4: Basic surgery skills, experience, and case management

**4.1** The graduate will safely, consistently, and effectively perform the core surgical skills required to successfully carry out any entry-level surgical procedure in common domestic species.

**\*\* This rubric defines competencies for each NGO that students should complete in each year of the curriculum\*\***

| Competency Rubric for each Year of the Curriculum                                                                                           | 1VM                                                                                                                                                                                                                                                                                                                                              | 2VM                                                                                                                                                                                                                                                                                                                                                                                                                                                                                              | 3VM                                                                                                                                                        | 4VM                                                                                                                                                          |
|---------------------------------------------------------------------------------------------------------------------------------------------|--------------------------------------------------------------------------------------------------------------------------------------------------------------------------------------------------------------------------------------------------------------------------------------------------------------------------------------------------|--------------------------------------------------------------------------------------------------------------------------------------------------------------------------------------------------------------------------------------------------------------------------------------------------------------------------------------------------------------------------------------------------------------------------------------------------------------------------------------------------|------------------------------------------------------------------------------------------------------------------------------------------------------------|--------------------------------------------------------------------------------------------------------------------------------------------------------------|
|                                                                                                                                             | <i>Level of competence following completion of year 1.</i>                                                                                                                                                                                                                                                                                       | <i>Level of competence following completion of year 2.</i>                                                                                                                                                                                                                                                                                                                                                                                                                                       | <i>Level of competence following completion of year 3.</i>                                                                                                 | <i>Expected level of competence at graduation.</i>                                                                                                           |
| <p><b>4.1</b><br/>Perform the core surgical skills required to carry out any entry-level surgical procedure in common domestic species.</p> | <p><b>1A. explain</b> anatomical relationships associated with entry-level surgical procedures</p> <p><b>1B. explain</b> the physiological considerations for entry-level surgical procedures</p> <p><b>1C. identify</b> and safely <b>handle</b> instruments required to perform entry-level surgical procedures in common domestic species</p> | <p><b>2A. match</b> instrument(s) with correct entry-level surgical procedures in common domestic species</p> <p><b>2B. match</b> tissue layer with appropriate suture material and suture pattern used in entry-level surgical procedures in common domestic species</p> <p><b>2C. perform</b> aseptic technique</p> <p><b>2D. perform</b> the core surgical skills required to <b>carry out</b> selected entry-level surgical procedures in common domestic species in a clinical scenario</p> | <p><b>3A. perform</b> the core surgical skills required to carry out entry-level surgical procedures in common domestic species in a clinical scenario</p> | <p><b>4A. perform</b> the core surgical skills required to carry out any entry-level surgical procedure in common domestic species in a clinical patient</p> |

Examples of session-level/meeting-level/unit-level outcomes to use as a guide to fulfill **NGO 4.1**:

- **locate** and **describe** the regional anatomy relevant to performing entry-level surgical procedures, including surgical landmarks and approaches,
- **distinguish** surgical procedures that require strict aseptic technique versus those that can be performed in the field, **perform** surgical scrubbing, gowning, and gloving in order to perform aseptic surgery,
- **prepare** a surgical site for aseptic surgery, **apply** the proper technique to maintain sterility during surgery, and **recognize** when sterility is broken during surgery,
- **identify** the major classes and common types of surgical instruments and **state** their appropriate surgical applications,
- **demonstrate** the proper grips and handling of each of the five basic classes of surgical instruments (i.e., scalpels, needle holders, clamps, scissors, and forceps),
- **identify** anatomical tissue layers and **explain** important considerations when handling them during surgery, including making and closing incisions,
- **perform** tissue handling techniques correctly during surgery using appropriate instruments to minimize tissue trauma,
- **identify** the major classes of suture material and **describe** their appropriate surgical applications,
- **select** the appropriate suture pattern for the surgical situation and **state** the advantages and disadvantages of each,
- **perform** the correct technique to tie surgical knots, **explain** their indications, and **recognize** when an improper ligature or pattern has been placed,
- **predict** potential complications of surgery and respond appropriately to complications when they arise,
- **identify** common types of drains, **state** their appropriate applications, and **demonstrate** the proper techniques to place them,
- **identify** common types of bandages, **state** their appropriate applications, and **demonstrate** the proper techniques to place them, as well as **describe** the potential complications when placed incorrectly.

**4.2** The graduate will **select** appropriate surgical interventions, based upon the identification of pathologic conditions and the evaluation of patient conditions, to treat surgical problems in common domestic species.

**\*\* This rubric defines competencies for each NGO that students should complete in each year of the curriculum\*\***

| Competency Rubric for each Year of the Curriculum                                                                                                                                                                                | 1VM                                                                                                                     | 2VM                                                                                                                                   | 3VM                                                                                                                                                                                                                                                                                                                                                                         | 4VM                                                                                                                                                                                                                                                                                                                                                                       |
|----------------------------------------------------------------------------------------------------------------------------------------------------------------------------------------------------------------------------------|-------------------------------------------------------------------------------------------------------------------------|---------------------------------------------------------------------------------------------------------------------------------------|-----------------------------------------------------------------------------------------------------------------------------------------------------------------------------------------------------------------------------------------------------------------------------------------------------------------------------------------------------------------------------|---------------------------------------------------------------------------------------------------------------------------------------------------------------------------------------------------------------------------------------------------------------------------------------------------------------------------------------------------------------------------|
|                                                                                                                                                                                                                                  | <i>Level of competence following completion of year 1.</i>                                                              | <i>Level of competence following completion of year 2.</i>                                                                            | <i>Level of competence following completion of year 3.</i>                                                                                                                                                                                                                                                                                                                  | <i>Expected level of competence at graduation.</i>                                                                                                                                                                                                                                                                                                                        |
| <p><b>4.2</b><br/> <b>Select</b> appropriate surgical interventions, based upon the identification of pathologic conditions and the evaluation of patient conditions, to treat surgical problems in common domestic species.</p> | <p><b>1A. describe</b> normal physiologic conditions and anatomical presentations relevant to surgical intervention</p> | <p><b>2A. identify</b> pathologic conditions and abnormal anatomical presentations that may be managed with surgical intervention</p> | <p><b>3A. select</b> appropriate surgical interventions, based upon the identification of pathologic conditions and the evaluation of patient conditions, to treat surgical problems in common domestic species in a clinical scenario</p> <p><b>3B. formulate</b> and <b>communicate</b> the benefits, risks, and costs of a surgical procedure in a clinical scenario</p> | <p><b>4A. select</b> appropriate surgical interventions, based upon the identification of pathologic conditions and the evaluation of patient conditions, to treat surgical problems in common domestic species in a clinical patient</p> <p><b>4B. formulate</b> and <b>communicate</b> the benefits, risks, and costs of a surgical procedure in a clinical patient</p> |

Examples of session-level/meeting-level/unit-level outcomes to use as a guide to fulfill **NGO 4.2**:

- **identify** normal anatomical structures and **recognize** altered anatomical relationships between structures on physical exam and/or specialized exam (i.e., lameness exam, ophthalmic exam) or via imaging modalities and describe what structures are altered and/or damaged,
- **recognize** the need for surgical intervention based upon interpretation of clinical signs and diagnostic tests,
- use knowledge of physiology to **evaluate** the physical status of the patient and **identify** abnormalities that should be addressed prior to surgery,
- **describe** surgical procedures that are appropriate for a given patient and **explain** the advantages and disadvantages of each procedure,
- **formulate** a surgical treatment plan for a patient based upon the benefits and risks to the patient, as well as financial considerations of the owner,
- **formulate** and effectively **deliver** a communication plan that includes the potential benefits and risks of the surgical procedures, as well as potential complications and costs to the owner,
- **identify** appropriate resource(s) to consult before performing an unfamiliar surgical procedure,
- **recognize** cases that require surgical expertise beyond the level possessed by the graduate and therefore require consultation and/or referral.

**4.3** The graduate will **apply** the standards of high-quality postoperative patient care in all common domestic species.

**\*\* This rubric defines competencies for each NGO that students should complete in each year of the curriculum\*\***

| Competency Rubric for each Year of the Curriculum                                                                 | 1VM                                                        | 2VM                                                                                                                                                                                                                            | 3VM                                                                                                                 | 4VM                                                                                                               |
|-------------------------------------------------------------------------------------------------------------------|------------------------------------------------------------|--------------------------------------------------------------------------------------------------------------------------------------------------------------------------------------------------------------------------------|---------------------------------------------------------------------------------------------------------------------|-------------------------------------------------------------------------------------------------------------------|
|                                                                                                                   | <i>Level of competence following completion of year 1.</i> | <i>Level of competence following completion of year 2.</i>                                                                                                                                                                     | <i>Level of competence following completion of year 3.</i>                                                          | <i>Expected level of competence at graduation.</i>                                                                |
| <p><b>4.3</b><br/>Apply the standards of pre- and post-operative patient care in all common domestic species.</p> |                                                            | <p><b>2A. recognize</b> the needs of the pre- and postoperative patient</p> <p><b>2B. demonstrate</b> pre- and postoperative care techniques associated with entry-level surgical interventions in common domestic species</p> | <p><b>3A. perform</b> pre- and postoperative patient care in all common domestic species in a clinical scenario</p> | <p><b>4A. perform</b> pre- and postoperative patient care in clinical patients of all common domestic species</p> |

Examples of session-level/meeting-level/unit-level outcomes to use as a guide to fulfill **NGO 4.3**:

- **recognize** the importance of postoperative support and pain management to achieving successful surgical outcomes,
- **develop** a postoperative patient plan that includes postoperative monitoring and the need for additional diagnostics or therapies,
- use knowledge of anatomy and physiology to **monitor** patients postoperatively,
- **recognize** the ongoing needs of the postoperative patient and **provide** appropriate postoperative and wound management to facilitate patient recovery,
- **communicate** with all members of the health care team to ensure a standard level of patient care within the practice,
- **determine** the appropriate length of hospitalization based upon the surgical procedure, as well as the patient status,
- **recognize** the need for an advanced home care plan that may include physical rehabilitation and pain management,
- **formulate** and **communicate** an effective homecare plan based on the ongoing needs of the patient and the ability of the owner to comply with recommendations,
- **formulate** an appropriate recheck plan for each common surgical procedure,
- **communicate** effectively with specialists who have performed surgery to coordinate appropriate postoperative patient care.

## NGO 5: Basic medicine skills, experience and case management

**5.1** The graduate will safely, consistently, and effectively **perform** the basic medical procedures required to successfully manage common medical conditions in common domestic species.

**\*\* This rubric defines competencies for each NGO that students should complete in each year of the curriculum\*\***

| Competency Rubric for each Year of the Curriculum                                                                                          | 1VM                                                                                                                                                                                                                                                                         | 2VM                                                                               | 3VM                                                                                                                 | 4VM                                                                                                                |
|--------------------------------------------------------------------------------------------------------------------------------------------|-----------------------------------------------------------------------------------------------------------------------------------------------------------------------------------------------------------------------------------------------------------------------------|-----------------------------------------------------------------------------------|---------------------------------------------------------------------------------------------------------------------|--------------------------------------------------------------------------------------------------------------------|
|                                                                                                                                            | <i>Level of competence following completion of year 1.</i>                                                                                                                                                                                                                  | <i>Level of competence following completion of year 2.</i>                        | <i>Level of competence following completion of year 3.</i>                                                          | <i>Expected level of competence at graduation.</i>                                                                 |
| <p><b>5.1</b><br/>Perform the medical procedures required to successfully manage common medical conditions in common domestic species.</p> | <p><b>1A.</b> explain physiological conditions relative to common medical procedures</p> <p><b>1B.</b> locate and describe the regional anatomy relevant to common medical procedures</p> <p><b>1C.</b> perform selected medical procedures for common domestic species</p> | <p><b>2A.</b> perform selected medical procedures for common domestic species</p> | <p><b>3A.</b> perform the medical procedures required to manage common medical conditions in clinical scenarios</p> | <p><b>4A.</b> perform the medical procedures required to manage common medical conditions in clinical patients</p> |

Examples of session-level/meeting-level/unit-level outcomes to use as a guide to fulfill **NGO 5.1**:

- locate and describe the regional anatomy relevant to common medical procedures,
- select appropriate medical procedures, taking into consideration the benefits and risks to the patient, owner finances, as well as the safety of the patient, owner, and other members of the health care team,
- describe and perform the basic medical procedures on patients safely and effectively.

**5.2** The graduate will **formulate** and **implement** appropriate medical treatment plans based upon patient findings to address the acute and long-term needs in all common domestic species.

**\*\* This rubric defines competencies for each NGO that students should complete in each year of the curriculum\*\***

| Competency Rubric for each Year of the Curriculum                                                                                                                            | 1VM                                                                                        | 2VM                                                                                                                                                                                                                                                               | 3VM                                                                                                                                                                                                                                                                   | 4VM                                                                                                                                                                                                                                            |
|------------------------------------------------------------------------------------------------------------------------------------------------------------------------------|--------------------------------------------------------------------------------------------|-------------------------------------------------------------------------------------------------------------------------------------------------------------------------------------------------------------------------------------------------------------------|-----------------------------------------------------------------------------------------------------------------------------------------------------------------------------------------------------------------------------------------------------------------------|------------------------------------------------------------------------------------------------------------------------------------------------------------------------------------------------------------------------------------------------|
|                                                                                                                                                                              | <i>Level of competence following completion of year 1.</i>                                 | <i>Level of competence following completion of year 2.</i>                                                                                                                                                                                                        | <i>Level of competence following completion of year 3.</i>                                                                                                                                                                                                            | <i>Expected level of competence at graduation.</i>                                                                                                                                                                                             |
| <p><b>5.2</b><br/> <b>Formulate</b> and <b>implement</b> medical treatment and prevention plans to address the acute and long-term needs in all common domestic species.</p> | <p><b>1A. explain</b> physiological processes that may be altered by medical treatment</p> | <p><b>2A. recognize and explain</b> abnormal patient findings in common domestic species</p> <p><b>2B. explain</b> abnormal physiological processes that may require medical treatment</p> <p><b>2C. identify</b> treatment options based on patient findings</p> | <p><b>3A. formulate</b> and <b>implement</b> medical treatment and prevention plans to address the acute and long-term needs in a clinical scenario</p> <p><b>3B. communicate</b> medical treatment and prevention plans options to clients in clinical scenarios</p> | <p><b>4A. formulate</b> and <b>implement</b> medical treatment and prevention plans to address the acute and long-term needs in a clinical patient</p> <p><b>4B. communicate</b> medical treatment and prevention plans options to clients</p> |

Examples of session-level/meeting-level/unit-level outcomes to use as a guide to fulfill **NGO 5.2**:

- **list** and **describe** the common and significant diseases that are developmental, degenerative, metabolic, nutritional, neoplastic, infectious, immune mediated, toxic, and traumatic in nature for each of the common domestic species,
- **explain** the pathophysiology of common and significant diseases and **recognize** and **explain** the associated gross and histopathology lesions that may occur in the major organ systems,
- **describe** the normal and abnormal functions of the immune system and **apply** knowledge of immunology to **formulate** medical treatment plans,
- **assess** the grade and/or stage of disease in order to predict disease course and prognosis,
- **formulate** a comprehensive medical treatment plan to address the acute and long-term needs of the patient,
- **utilize** common veterinary products in an appropriate manner in order to **implement** a comprehensive medical treatment plan,
- **formulate** an appropriate dietary plan to meet the acute and long-term needs of the patient,
- use knowledge of physiology to **monitor** patient response to medical treatment,
- **predict** potential complications of the medical treatment plan and respond appropriately to complications when they arise,
- **formulate** and effectively **communicate** a homecare and recheck plan based on the ongoing needs of the patient and the ability of the owner to comply with recommendations.

**5.3** The graduate will **formulate** and **implement** an appropriate behavioral treatment plan based upon patient history and clinical findings to address the acute and long-term behavioral needs in common domestic species.

**\*\* This rubric defines competencies for each NGO that students should complete in each year of the curriculum\*\***

| Competency Rubric for each Year of the Curriculum                                                                                                                                                                         | 1VM                                                                                                                                          | 2VM                                                                                                                                                                                                                                                                  | 3VM                                                                                                                                                                                 | 4VM                                                                                                                                                                                                           |
|---------------------------------------------------------------------------------------------------------------------------------------------------------------------------------------------------------------------------|----------------------------------------------------------------------------------------------------------------------------------------------|----------------------------------------------------------------------------------------------------------------------------------------------------------------------------------------------------------------------------------------------------------------------|-------------------------------------------------------------------------------------------------------------------------------------------------------------------------------------|---------------------------------------------------------------------------------------------------------------------------------------------------------------------------------------------------------------|
|                                                                                                                                                                                                                           | <i>Level of competence following completion of year 1.</i>                                                                                   | <i>Level of competence following completion of year 2.</i>                                                                                                                                                                                                           | <i>Level of competence following completion of year 3.</i>                                                                                                                          | <i>Expected level of competence at graduation.</i>                                                                                                                                                            |
| <p><b>5.3</b><br/> <b>Formulate</b> and <b>implement</b> a behavioral treatment plan based upon patient history and clinical findings to address the acute and long-term behavioral needs in common domestic species.</p> | <p><b>1A. recognize</b> normal behaviors in common domestic species</p> <p><b>1B. list</b> abnormal behaviors in common domestic species</p> | <p><b>2A. recognize</b> abnormal behaviors in common domestic species</p> <p><b>2B. distinguish</b> the origin of abnormal behaviors in common domestic species</p> <p><b>2C. identify</b> behavioral concerns in common domestic species in a clinical scenario</p> | <p><b>3A. formulate</b> a behavioral treatment plan based upon patient history and clinical findings to address the acute and long-term behavioral needs in a clinical scenario</p> | <p><b>4A. formulate</b> a behavioral treatment plan based upon patient history and clinical findings to address the acute and long-term behavioral needs in common domestic species in a clinical patient</p> |

Examples of session-level/meeting-level/unit-level outcomes to use as a guide to fulfill **NGO 5.3**:

- **describe** the anatomical variations in the sense organs of common domestic species and their impact on sensory perception,
- **describe** the principles of animal learning and **explain** how learning relates to normal and abnormal animal behavior,
- **recognize** normal animal behaviors within common management practices,
- **diagnose** common behavioral concerns identified by owners,
- **describe** medical and behavioral components that mimic one another,
- **formulate** a comprehensive treatment plan to address common behavioral problems,
- **communicate** a treatment plan to the owner that addresses the ongoing needs of the patient and the ability of the owner to comply with recommendations.

## NGO 6: Emergency and intensive care case management

**6.1** The graduate will **recognize** the clinical signs associated with a patient emergency in all common domestic species and **formulate** an appropriate emergency protocol in order to rapidly assess and stabilize the patient.

**\*\* This rubric defines competencies for each NGO that students should complete in each year of the curriculum\*\***

| Competency Rubric for each Year of the Curriculum                                                                                                                                          | 1VM                                                                                                                                                                                                                                                                  | 2VM                                                                                                                        | 3VM                                                                                                                                                                                                                        | 4VM                                                                                                                                                                                                                    |
|--------------------------------------------------------------------------------------------------------------------------------------------------------------------------------------------|----------------------------------------------------------------------------------------------------------------------------------------------------------------------------------------------------------------------------------------------------------------------|----------------------------------------------------------------------------------------------------------------------------|----------------------------------------------------------------------------------------------------------------------------------------------------------------------------------------------------------------------------|------------------------------------------------------------------------------------------------------------------------------------------------------------------------------------------------------------------------|
|                                                                                                                                                                                            | <i>Level of competence following completion of year 1.</i>                                                                                                                                                                                                           | <i>Level of competence following completion of year 2.</i>                                                                 | <i>Level of competence following completion of year 3.</i>                                                                                                                                                                 | <i>Expected level of competence at graduation.</i>                                                                                                                                                                     |
| <p><b>6.1</b><br/>Recognize the clinical signs associated with a patient emergency in common domestic species and formulate an emergency protocol to assess and stabilize the patient.</p> | <p><b>1A.</b> prioritize components of the physical examination in the emergent patient</p> <p><b>1B.</b> recognize clinical signs associated with the emergent patient</p> <p><b>1C.</b> define common medical terminology associated with the emergent patient</p> | <p><b>2A.</b> identify interventions associated with the emergent patient</p> <p><b>2B.</b> categorize emergent status</p> | <p><b>3A.</b> recognize the clinical signs associated with a patient emergency in common domestic species</p> <p><b>3B.</b> formulate an emergency protocol to assess and stabilize the patient in a clinical scenario</p> | <p><b>4A.</b> recognize the clinical signs associated with a patient emergency in common domestic species</p> <p><b>4B.</b> formulate an emergency protocol to assess and stabilize the patient in a clinical case</p> |

Examples of session-level/meeting-level/unit-level outcomes to use as a guide to fulfill **NGO 6.1**:

- use knowledge of anatomy and physiology to **recognize** a patient emergency based upon physical examination and clinical findings,
- **categorize** the type of medical emergency according to the type of problem and plan accordingly,
- **recall** the common medical procedures used to stabilize patients in critical condition and clearly **explain** the indications and limitations of each procedure,
- **classify** common therapeutic veterinary products that can be used to stabilize patients and **explain** their mechanisms of action, pharmacologic properties, and physiologic effects on the patient,
- **formulate** an appropriate treatment plan to attempt patient stabilization, taking into account the benefits and risks, prognosis, and financial considerations of the owner,
- **recognize** when patient stabilization is not possible and effectively **communicate** the option of euthanasia with the owner,
- **design** a triage protocol for the health care team that provides for rapid assessment and prioritization of the medical needs of multiple patients.



**6.2** The graduate will apply an emergency treatment plan to stabilize a patient in critical condition, including safely, consistently, and effectively performing basic emergency procedures.

**\*\* This rubric defines competencies for each NGO that students should complete in each year of the curriculum\*\***

| Competency Rubric for each Year of the Curriculum                                                                            | 1VM                                                                                                                                                                                         | 2VM                                                                                                                                                                                                                                                                                                                                   | 3VM                                                                                                                                                                                                                                                                                                         | 4VM                                                                                                                                                                                                                   |
|------------------------------------------------------------------------------------------------------------------------------|---------------------------------------------------------------------------------------------------------------------------------------------------------------------------------------------|---------------------------------------------------------------------------------------------------------------------------------------------------------------------------------------------------------------------------------------------------------------------------------------------------------------------------------------|-------------------------------------------------------------------------------------------------------------------------------------------------------------------------------------------------------------------------------------------------------------------------------------------------------------|-----------------------------------------------------------------------------------------------------------------------------------------------------------------------------------------------------------------------|
|                                                                                                                              | <i>Level of competence following completion of year 1.</i>                                                                                                                                  | <i>Level of competence following completion of year 2.</i>                                                                                                                                                                                                                                                                            | <i>Level of competence following completion of year 3.</i>                                                                                                                                                                                                                                                  | <i>Expected level of competence at graduation.</i>                                                                                                                                                                    |
| <p><b>6.2</b><br/>Apply a treatment plan to stabilize a patient in critical condition, and perform emergency procedures.</p> | <p><b>1A. prioritize</b> affected physiologic systems in the emergent patient</p> <p><b>1B. identify and describe</b> anatomical structures associated with common emergency procedures</p> | <p><b>2A. perform</b> components of emergency procedures in a clinical scenario</p> <p><b>2B. develop</b> a stabilization plan for an emergent patient</p> <p><b>2C. communicate</b> with others during an emergency clinical scenario</p> <p><b>2D. describe</b> the management of the healthcare team in an emergency situation</p> | <p><b>3A. apply</b> a treatment plan to stabilize a patient in critical condition, and perform emergency procedures in a clinical scenario</p> <p><b>3B. manage</b> a healthcare team in an emergency clinical scenario</p> <p><b>3C. communicate</b> with others during an emergency clinical scenario</p> | <p><b>4A. apply</b> a treatment plan to stabilize a patient in critical condition, and perform emergency procedures in a clinical patient</p> <p><b>4B. communicate</b> with others during an emergency situation</p> |

Examples of session-level/meeting-level/unit-level outcomes to use as a guide to fulfill **NGO 6.2**:

- **locate** and **describe** the regional anatomy relevant to performing basic emergency procedures,
- **demonstrate** the proper technique to safely, consistently, and effectively **perform** all basic emergency procedures used to stabilize patients,
- **implement** a comprehensive treatment plan in order to successfully **manage** a patient in critical condition,
- **manage** a health care team effectively during a patient emergency,
- **communicate** with owners effectively to present treatment options for a patient in critical condition, including discussing the potential benefits and risks of the procedure(s), prognosis, and costs,
- **communicate** with owners effectively on a regular basis in order to keep them well informed during a dynamic emergency situation.

**6.3** The graduate will **recognize** patient conditions that require intensive care, **appraise** the level of care required, and **implement** appropriate treatment protocols, including **managing** the transfer or referral of a patient to another facility when indicated.

**\*\* This rubric defines competencies for each NGO that students should complete in each year of the curriculum\*\***

| Competency Rubric for each Year of the Curriculum                                                                                                                                                                                                                        | 1VM                                                                                                                                                             | 2VM                                                                                                                                                                                                                                                                                                                                                                               | 3VM                                                                                                                                                                                                                                                                                                                                                                                                                                                                                                                                                                                             | 4VM                                                                                                                                                                                                                                                                                |
|--------------------------------------------------------------------------------------------------------------------------------------------------------------------------------------------------------------------------------------------------------------------------|-----------------------------------------------------------------------------------------------------------------------------------------------------------------|-----------------------------------------------------------------------------------------------------------------------------------------------------------------------------------------------------------------------------------------------------------------------------------------------------------------------------------------------------------------------------------|-------------------------------------------------------------------------------------------------------------------------------------------------------------------------------------------------------------------------------------------------------------------------------------------------------------------------------------------------------------------------------------------------------------------------------------------------------------------------------------------------------------------------------------------------------------------------------------------------|------------------------------------------------------------------------------------------------------------------------------------------------------------------------------------------------------------------------------------------------------------------------------------|
|                                                                                                                                                                                                                                                                          | <i>Level of competence following completion of year 1.</i>                                                                                                      | <i>Level of competence following completion of year 2.</i>                                                                                                                                                                                                                                                                                                                        | <i>Level of competence following completion of year 3.</i>                                                                                                                                                                                                                                                                                                                                                                                                                                                                                                                                      | <i>Expected level of competence at graduation.</i>                                                                                                                                                                                                                                 |
| <p><b>6.3</b><br/>Recognize patient conditions that require critical care, <b>appraise</b> the level of care required, and <b>implement</b> treatment protocols, including <b>managing</b> the transfer or referral of a patient to another facility when indicated.</p> | <p><b>1A. demonstrate</b> technical skills associated with treatment protocols</p> <p><b>1B. identify</b> components of a written patient referral document</p> | <p><b>2A. describe</b> resources necessary to provide critical care</p> <p><b>2B. synthesize</b> physical examination and diagnostic results to provide ongoing patient management in a clinical scenario</p> <p><b>2C. recognize</b> the pathophysiologic processes associated with patients in critical care</p> <p><b>2D. complete</b> a written patient referral document</p> | <p><b>3A. recognize</b> patient conditions that require critical care, <b>appraise</b> the level of care required, <b>design</b> treatment protocols, including managing the transfer or referral of a patient to another facility when indicated in a clinical scenario</p> <p><b>3B. determine</b> when referral is necessary based on available resources for a patient requiring critical care in a clinical scenario</p> <p><b>3C. communicate</b> patient transfer with referral hospital, client and veterinarian through both oral and written communication in a clinical scenario</p> | <p><b>4A. recognize</b> patient conditions that require critical care, <b>appraise</b> the level of care required, and <b>implement</b> treatment protocols, including managing the transfer or referral of a patient to another facility when indicated in a clinical patient</p> |

Examples of session-level/meeting-level/unit-level outcomes to use as a guide to fulfill **NGO 6.3**:

- use knowledge of anatomy and physiology to **differentiate** between patients that require intensive care and basic care during hospitalization, based upon the physical examination and other clinical findings,
- **list** the parameters that are used to monitor patients at regular intervals during hospitalization in intensive care,
- **classify** common therapeutic veterinary products used to manage patients requiring intensive care and **explain** their mechanisms of action, pharmacologic properties, and physiologic effects on the patient,
- **formulate** an appropriate treatment plan for a patient that requires intensive care taking into consideration the potential risks and benefits, prognosis, and financial considerations of the owner,
- **communicate** with the owner to present treatment options for a patient requiring intensive care, including discussing the severity of disease, prognosis, potential benefits and risks of any procedure(s), and the costs,
- **implement** a treatment plan for a patient requiring intensive care during hospitalization, including **managing** a health care team in order to fully meet the needs of the patient,
- **utilize** professional guidelines and **assess** personal professional competency level to **judge** when it is appropriate to refer a patient.

## NGO 7: Health promotion, disease prevention/biosecurity, zoonosis, and food safety

**7.1** The graduate will **evaluate** risk factors for individual or groups of animals for medical conditions in common domestic species.

**\*\* This rubric defines competencies for each NGO that students should complete in each year of the curriculum\*\***

| Competency Rubric for each Year of the Curriculum                                                                                  | 1VM                                                                          | 2VM                                                                                                                                       | 3VM                                                                                                                                                  | 4VM                                                                                                                                                 |
|------------------------------------------------------------------------------------------------------------------------------------|------------------------------------------------------------------------------|-------------------------------------------------------------------------------------------------------------------------------------------|------------------------------------------------------------------------------------------------------------------------------------------------------|-----------------------------------------------------------------------------------------------------------------------------------------------------|
|                                                                                                                                    | <i>Level of competence following completion of year 1.</i>                   | <i>Level of competence following completion of year 2.</i>                                                                                | <i>Level of competence following completion of year 3.</i>                                                                                           | <i>Expected level of competence at graduation.</i>                                                                                                  |
| <p><b>7.1</b><br/>Evaluate risk factors for individual or groups of animals for medical conditions in common domestic species.</p> | <p><b>1A. define</b> risk factors for disease in common domestic species</p> | <p><b>2A. identify</b> the presence of risk factors for disease</p> <p><b>2B. explain</b> methods to mitigate risk factors of disease</p> | <p><b>3A. evaluate</b> risk factors for individual or groups of animals for medical conditions in common domestic species in a clinical scenario</p> | <p><b>4A. evaluate</b> risk factors for individual or groups of animals for medical conditions in common domestic species in a clinical patient</p> |

Examples of session-level/meeting-level/unit-level outcomes to use as a guide to fulfill **NGO 7.1**:

- **list** the risk factors for common and significant diseases that are developmental, degenerative, metabolic, nutritional, neoplastic, infectious, immune mediated, toxic, and traumatic in nature,
- **interpret** the signalment (i.e., age, sex, breed, and function), patient history, and other conditions to **identify** the presence of risk factors for disease,
- **explain** the methods for mitigating or eliminating risk factors for disease.

**7.2** The graduate will **design** and **implement** preventive programs, encompassing biosecurity and animal husbandry, to improve the health and well-being of individual animals and animal populations.

**\*\* This rubric defines competencies for each NGO that students should complete in each year of the curriculum\*\***

| Competency Rubric for each Year of the Curriculum                                                                                                                                                 | 1VM                                                                                                                                                                                                                                                                                                                                                                                          | 2VM                                                                                                                                                                                                                                                                                                                                                                                                 | 3VM                                                                                                                                                                                                                                                                                         | 4VM                                                                                                                                                                                                                                                                                             |
|---------------------------------------------------------------------------------------------------------------------------------------------------------------------------------------------------|----------------------------------------------------------------------------------------------------------------------------------------------------------------------------------------------------------------------------------------------------------------------------------------------------------------------------------------------------------------------------------------------|-----------------------------------------------------------------------------------------------------------------------------------------------------------------------------------------------------------------------------------------------------------------------------------------------------------------------------------------------------------------------------------------------------|---------------------------------------------------------------------------------------------------------------------------------------------------------------------------------------------------------------------------------------------------------------------------------------------|-------------------------------------------------------------------------------------------------------------------------------------------------------------------------------------------------------------------------------------------------------------------------------------------------|
|                                                                                                                                                                                                   | <i>Level of competence following completion of year 1.</i>                                                                                                                                                                                                                                                                                                                                   | <i>Level of competence following completion of year 2.</i>                                                                                                                                                                                                                                                                                                                                          | <i>Level of competence following completion of year 3.</i>                                                                                                                                                                                                                                  | <i>Expected level of competence at graduation.</i>                                                                                                                                                                                                                                              |
| <p><b>7.2</b><br/>Design and implement preventive programs, encompassing biosecurity and animal husbandry, to improve the health and well-being of individual animals and animal populations.</p> | <p><b>1A.</b> recognize and classify common bacterial, viral and fungal pathogens of animals</p> <p><b>1B.</b> describe the function of the immune system and its role in designing effective disease prevention programs</p> <p><b>1C.</b> recognize the role of the environment in animal husbandry</p> <p><b>1D.</b> explain the unique nutritional needs for common domestic species</p> | <p><b>2A.</b> describe common pathogens of animals and their potential impact on animal health</p> <p><b>2B.</b> recognize and assess biosecurity risks in a defined environment, formulate a biosecurity and communication plan for a defined situation in a clinical scenario</p> <p><b>2C.</b> formulate nutritional plans that promote the health and well-being of common domestic species</p> | <p><b>3A.</b> design preventive programs to improve the health and well-being of individual animals and animal populations in a clinical scenario</p> <p><b>3B.</b> develop and communicate a comprehensive preventive program to clients and the healthcare team in clinical scenarios</p> | <p><b>4A.</b> implement preventive programs, encompassing biosecurity and animal husbandry, to improve the health and well-being of clinical patients</p> <p><b>4B.</b> develop and communicate a comprehensive preventive program to clients and the healthcare team for clinical patients</p> |

Examples of session-level/meeting-level/unit-level outcomes to use as a guide to fulfill **NGO 7.2**:

- recognize and classify important viral, bacterial, fungal, and parasitic pathogens of animals,
- relate pathogens with common infectious diseases and understand their potential impact on population health,
- describe the function of the immune system and apply their knowledge of immunology to design disease prevention programs addressing animal health and husbandry,
- classify common therapeutic veterinary products used in preventive programs and explain their mechanisms of action, pharmacologic properties, and physiologic effects on animals,
- design vaccination and parasite management and prevention programs for individual animals and animal populations,
- explain the unique nutritional needs of each of the common domestic species and formulate nutritional plans that promote the health and well-being of animals,<sup>1</sup>
- recognize the role of epidemiologic study design and its application to disease prevention and control,
- explain the role of veterinarians in safeguarding against agroterrorism and bioterrorism,
- identify diseases of regulatory importance,
- recognize the principles of biosecurity, including sanitary methods, the movement of animals and people, immunity, and biocontainment,
- assess the biosecurity risks in a defined environment, formulate a biosecurity plan for a defined situation, and communicate the appropriate biosecurity protocol to clients or the public,
- formulate a comprehensive preventive plan, taking into consideration feasibility of implementation, owner finances, and owner compliance,
- communicate to owners (in writing and orally) a comprehensive preventive plan in a manner that is readily understood and promotes adherence to recommendations,
- work with appropriate regulatory agencies to participate in an epidemiological inquiry in case of occurrence of a reportable disease, including collection, handling, and transport of appropriate specimens or samples.

**7.3** The graduate will **recognize** the potential for zoonoses and **communicate** evidence-based recommendations to clients and the healthcare team to minimize the risk of zoonotic disease transmission.

**\*\* This rubric defines competencies for each NGO that students should complete in each year of the curriculum\*\***

| Competency Rubric for each Year of the Curriculum                                                                                                                                                                  | 1VM                                                                                                                                                                 | 2VM                                                                                                                                           | 3VM                                                                                                                                                                                                                                    | 4VM                                                                                                                                                                                                                                |
|--------------------------------------------------------------------------------------------------------------------------------------------------------------------------------------------------------------------|---------------------------------------------------------------------------------------------------------------------------------------------------------------------|-----------------------------------------------------------------------------------------------------------------------------------------------|----------------------------------------------------------------------------------------------------------------------------------------------------------------------------------------------------------------------------------------|------------------------------------------------------------------------------------------------------------------------------------------------------------------------------------------------------------------------------------|
|                                                                                                                                                                                                                    | <i>Level of competence following completion of year 1.</i>                                                                                                          | <i>Level of competence following completion of year 2.</i>                                                                                    | <i>Level of competence following completion of year 3.</i>                                                                                                                                                                             | <i>Expected level of competence at graduation.</i>                                                                                                                                                                                 |
| <p><b>7.3</b><br/> <b>Recognize</b> the potential for zoonosis and <b>communicate</b> evidence-based recommendations to clients and the healthcare team to minimize the risk of zoonotic disease transmission.</p> | <p><b>1A. list</b> zoonotic pathogens</p> <p><b>1B. identify</b> sources of information to support current evidence-based recommendations for zoonotic diseases</p> | <p><b>2A. explain</b> pathogenesis associated with common zoonotic diseases</p> <p><b>2B. recognize</b> human-specific risks for zoonosis</p> | <p><b>3A. recognize</b> the potential for zoonosis in a clinical patient/group of animals</p> <p><b>3B. Recognize and communicate</b> a zoonotic disease prevention plan to clients and the healthcare team in a clinical scenario</p> | <p><b>4A. recognize</b> the potential for zoonosis in a clinical patient</p> <p><b>4B. communicate</b> evidence-based recommendations to clients and the healthcare team to minimize the risk of zoonotic disease transmission</p> |

Examples of session-level/meeting-level/unit-level outcomes to use as a guide to fulfill **NGO 7.3**:

- **list** the important zoonotic pathogens,
- **identify** the clinical signs, clinical course, transmission potential, and pathogen associated with common zoonotic diseases,
- **recognize** client-specific risks for zoonoses,
- **formulate** a customized zoonosis prevention plan for their clients,
- **communicate** and **document** in the medical record a zoonotic disease prevention plan in a manner that is readily understood and promotes client adherence to recommendations.

**7.4** The graduate will **apply** knowledge of common foodborne pathogens to effectively promote and maintain a safe food supply.

**\*\* This rubric defines competencies for each NGO that students should complete in each year of the curriculum\*\***

| Competency Rubric for each Year of the Curriculum                                                               | 1VM                                                        | 2VM                                                                                                                                                                                                                                                      | 3VM                                                                                                        | 4VM                                                                                                                                                                                                                                     |
|-----------------------------------------------------------------------------------------------------------------|------------------------------------------------------------|----------------------------------------------------------------------------------------------------------------------------------------------------------------------------------------------------------------------------------------------------------|------------------------------------------------------------------------------------------------------------|-----------------------------------------------------------------------------------------------------------------------------------------------------------------------------------------------------------------------------------------|
|                                                                                                                 | <i>Level of competence following completion of year 1.</i> | <i>Level of competence following completion of year 2.</i>                                                                                                                                                                                               | <i>Level of competence following completion of year 3.</i>                                                 | <i>Expected level of competence at graduation.</i>                                                                                                                                                                                      |
| <p><b>7.4</b><br/>Apply knowledge of common foodborne pathogens to promote and maintain a safe food supply.</p> | <p><b>1A. list</b> common foodborne pathogens</p>          | <p><b>2A. explain</b> recommended food safety practices for production facilities in a clinical scenario</p> <p><b>2B. communicate</b> with stakeholders about risk management, control and prevention of foodborne pathogens in a clinical scenario</p> | <p><b>3A. apply</b> knowledge of common foodborne pathogens to promote and maintain a safe food supply</p> | <p><b>4A. explain</b> recommended food safety practices for production facilities</p> <p><b>4B. communicate</b> with stakeholders/producers about risk management, control and prevention of foodborne pathogens for clinical cases</p> |

Examples of session-level/meeting-level/unit-level outcomes to use as a guide to fulfill **NGO 7.4**:

- **explain** on-farm food safety practices,
- **demonstrate** knowledge of state and federal regulations regarding food safety and inspection,
- **list** the important foodborne pathogens and link the pathogens to important food sources,
- **recommend** appropriate diagnostic testing measures to identify the source of the pathogen in a foodborne outbreak,
- **analyze** a client’s risk and formulate a customized prevention plan for foodborne disease,
- explain the purpose and function of a HACCP plan and **assess** the efficacy of a HACCP plan,
- **communicate** effectively with clients, producers, and regulatory personnel about risk management, control, and prevention of foodborne pathogens.

**7.5** The graduate will **apply** knowledge of noninfectious adulterants in the human and animal food supply to effectively promote and maintain a safe food supply.

**\*\* This rubric defines competencies for each NGO that students should complete in each year of the curriculum\*\***

| Competency Rubric for each Year of the Curriculum                                                                                                                                       | 1VM                                                                                                       | 2VM                                                                                                                                                                                                                                                                               | 3VM                                                                                                                     | 4VM                                                                                                                                                                                 |
|-----------------------------------------------------------------------------------------------------------------------------------------------------------------------------------------|-----------------------------------------------------------------------------------------------------------|-----------------------------------------------------------------------------------------------------------------------------------------------------------------------------------------------------------------------------------------------------------------------------------|-------------------------------------------------------------------------------------------------------------------------|-------------------------------------------------------------------------------------------------------------------------------------------------------------------------------------|
|                                                                                                                                                                                         | <i>Level of competence following completion of year 1.</i>                                                | <i>Level of competence following completion of year 2.</i>                                                                                                                                                                                                                        | <i>Level of competence following completion of year 3.</i>                                                              | <i>Expected level of competence at graduation.</i>                                                                                                                                  |
| <p><b>7.5</b><br/>The graduate will <b>apply</b> knowledge of noninfectious adulterants in the human and animal food supply to effectively promote and maintain a safe food supply.</p> | <p><b>1A. define</b> physical and chemical adulterants as it pertains to human and animal food supply</p> | <p><b>2A. formulate</b> drug treatment plans in clinical scenarios that support the judicious use of pharmaceuticals (drug residue, withdrawal times, antimicrobial resistance)</p> <p><b>2B. apply</b> knowledge of chemical and physical adulterants in a clinical scenario</p> | <p><b>3A. communicate</b> with stakeholders to promote compliance with food safety standards in a clinical scenario</p> | <p><b>4A. formulate</b> drug treatment plans for clinical patients that support the judicious use of pharmaceuticals (drug residue, withdrawal times, antimicrobial resistance)</p> |

Examples of session-level/meeting-level/unit-level outcomes to use as a guide to fulfill **NGO 7.5**:

- **explain** the principles of pharmacokinetics that are applied to develop drug withdrawal times,
- **recognize** the potential risks of animal feed contamination with biological/chemical adulterants,
- **formulate** drug treatment plans that support the judicious use of antimicrobials to minimize antibiotic resistance,
- **communicate** effectively with clients and producers in order to promote compliance with food safety standards.

**7.6** The graduate will **participate** in transdisciplinary efforts to safeguard human, environmental, and animal health to demonstrate the veterinary role in the One Health triad.

**\*\* This rubric defines competencies for each NGO that students should complete in each year of the curriculum\*\***

| Competency Rubric for each Year of the Curriculum                                                                                                                               | 1VM                                                            | 2VM                                                                            | 3VM                                                                                                       | 4VM                                                                                                                                                                        |
|---------------------------------------------------------------------------------------------------------------------------------------------------------------------------------|----------------------------------------------------------------|--------------------------------------------------------------------------------|-----------------------------------------------------------------------------------------------------------|----------------------------------------------------------------------------------------------------------------------------------------------------------------------------|
|                                                                                                                                                                                 | <i>Level of competence following completion of year 1.</i>     | <i>Level of competence following completion of year 2.</i>                     | <i>Level of competence following completion of year 3.</i>                                                | <i>Expected level of competence at graduation.</i>                                                                                                                         |
| <p><b>7.6</b><br/>Participate in interdisciplinary efforts to safeguard human, environmental, and animal health to demonstrate the veterinary role in the One Health triad.</p> | <p><b>1A. define</b> the importance of One Health medicine</p> | <p><b>2A. describe</b> the role veterinarians play in the One Health triad</p> | <p><b>3A. identify</b> interdisciplinary efforts to safeguard human, environmental, and animal health</p> | <p><b>4A. participate</b> in interdisciplinary efforts to safeguard human, environmental, and animal health to demonstrate the veterinary role in the One Health triad</p> |

Examples of session-level/meeting-level/unit-level outcomes to use as a guide to fulfill **NGO 7.6**:

- **discuss** the global economic, cultural, and environmental impacts and animal and human health-related issues associated with animal agriculture,
- **explain** the role of veterinarians in interacting with physicians, public health practitioners, and risk analysts to ensure safe food,
- **explain** the role of the veterinarian in disaster management,
- **work** within the federal, state-, and local-level framework for the development and implementation of disaster management plans,
- **develop** a personal disaster preparedness plan for their home or clinical practice,
- **recognize** the role of the veterinarian as an animal expert in the community,
- **explain** common mechanisms leading to the development of antimicrobial resistance in common pathogens,
- **provide** leadership to society on ethical considerations involved in the use and care of animals by humans.



## NGO 8: Client communications and ethical conduct

**8.1** The graduate will **communicate** with clients, colleagues, staff, and the general public through both oral and written communication, using appropriate professional language.

**\*\* This rubric defines competencies for each NGO that students should complete in each year of the curriculum\*\***

| Competency Rubric for each Year of the Curriculum                                                                                                                                       | 1VM                                                                                                                                                                                                                                                       | 2VM                                                                                                                                                                                                                           | 3VM                                                                                                                                                                                                                         | 4VM                                                                                                                                                                                       |
|-----------------------------------------------------------------------------------------------------------------------------------------------------------------------------------------|-----------------------------------------------------------------------------------------------------------------------------------------------------------------------------------------------------------------------------------------------------------|-------------------------------------------------------------------------------------------------------------------------------------------------------------------------------------------------------------------------------|-----------------------------------------------------------------------------------------------------------------------------------------------------------------------------------------------------------------------------|-------------------------------------------------------------------------------------------------------------------------------------------------------------------------------------------|
|                                                                                                                                                                                         | <i>Level of competence following completion of year 1.</i>                                                                                                                                                                                                | <i>Level of competence following completion of year 2.</i>                                                                                                                                                                    | <i>Level of competence following completion of year 3.</i>                                                                                                                                                                  | <i>Expected level of competence at graduation.</i>                                                                                                                                        |
| <p><b>8.1</b><br/> <b>Communicate</b> with clients, colleagues, staff, and the general public through both oral and written communication, using appropriate professional language.</p> | <p><b>1A. recognize and demonstrate</b> core communication skills in low risk team and client-based scenarios</p> <p><b>1B. communicate</b> in oral and written form using appropriate communication skills, and scientific and professional language</p> | <p><b>2A. communicate</b> in oral and written form in challenging clinical scenarios with clients, colleagues, staff, and general public using appropriate communication skills, and scientific and professional language</p> | <p><b>3A. communicate</b> in oral and written form in high risk clinical scenarios with clients, colleagues, staff, and general public using appropriate communication skills, and scientific and professional language</p> | <p><b>4A. communicate</b> with clients, colleagues, staff, and the general public through both oral and written communication, using appropriate scientific and professional language</p> |

Examples of session-level/meeting-level/unit-level outcomes to use as a guide to fulfill **NGO 8.1**:

- **explain** the role of client education in providing high-quality patient care,
- **describe** the precepts of good verbal and nonverbal communication techniques,
- **apply** the concept of veterinarian-client-patient relationship in order to maintain appropriate client confidentiality,
- **list** several channels veterinarians can utilize to communicate with their clients,
- **adjust** their language to the level of education or experience of the client when communicating with a client,
- **demonstrate** situational awareness to modulate their verbal and nonverbal communication as needed in order to be congruent with the situation,
- **develop** and implement an effective client communication plan, including providing instructions for long-term patient care,
- **develop** and **implement** a multichannel public relations plan for the general public.

## 8.2 The graduate will demonstrate professional conduct.

**\*\* This rubric defines competencies for each NGO that students should complete in each year of the curriculum\*\***

| Competency Rubric for each Year of the Curriculum       | 1VM                                                                                                                                                                                                                                                                                     | 2VM                                                                                                                                                  | 3VM                                                                                                                                  | 4VM                                                                                                                                                                                      |
|---------------------------------------------------------|-----------------------------------------------------------------------------------------------------------------------------------------------------------------------------------------------------------------------------------------------------------------------------------------|------------------------------------------------------------------------------------------------------------------------------------------------------|--------------------------------------------------------------------------------------------------------------------------------------|------------------------------------------------------------------------------------------------------------------------------------------------------------------------------------------|
|                                                         | <i>Level of competence following completion of year 1.</i>                                                                                                                                                                                                                              | <i>Level of competence following completion of year 2.</i>                                                                                           | <i>Level of competence following completion of year 3.</i>                                                                           | <i>Expected level of competence at graduation.</i>                                                                                                                                       |
| <p><b>8.2</b><br/>Demonstrate professional conduct.</p> | <p><b>1A. demonstrate</b> honesty, integrity, and fairness in interactions with others</p> <p><b>1B. describe</b> self-awareness and self-management</p> <p><b>1C. analyze</b> situations that pose ethical dilemmas, <b>identify</b> resources and develop an appropriate response</p> | <p><b>2A. demonstrate</b> professional conduct</p> <p><b>2B. recognize</b> inappropriate behavior and <b>suggest</b> possible corrective actions</p> | <p><b>3A. demonstrate</b> professional conduct</p> <p><b>3B. recognize and take</b> corrective action for inappropriate behavior</p> | <p><b>4A. demonstrate</b> professional conduct with clients, staff, colleagues, and general public</p> <p><b>4B. recognize and take</b> corrective action for inappropriate behavior</p> |

Examples of session-level/meeting-level/unit-level outcomes to use as a guide to fulfill **NGO 8.2**:

- **demonstrate** honesty, integrity, and fairness in interactions with colleagues and clients,
- **recognize** the importance of conducting themselves in an ethical manner in order to maintain the overall well-being of the veterinary profession,
- **recognize** situations that pose a potential conflict of interest and take appropriate measures to avoid or resolve the conflict,
- **demonstrate** professional behavior in a consistent manner and **recognize** inappropriate behavior in others that requires corrective action,
- **identify** situations that may pose an ethical dilemma and take measures to avoid or resolve the issue,
- **recognize** a professional error and take appropriate corrective measures to reduce or prevent future errors,
- **communicate** a professional mistake to their client and/or health care team and **choose** appropriate corrective actions,
- **recognize** the ethical responsibility to provide essential services to save lives and relieve animal suffering.

## NGO 9: Critical analysis of new information and research findings relevant to veterinary medicine

**9.1** The graduate will identify, review, and critically **evaluate** biomedical literature and apply it to the practice of contemporary, evidence-based veterinary medicine.

**\*\* This rubric defines competencies for each NGO that students should complete in each year of the curriculum\*\***

| Competency Rubric for each Year of the Curriculum                                                                                                                              | 1VM                                                                                                                                                                                                            | 2VM                                                                                                                                                                                                                                                                                                                                                                                         | 3VM                                                                                        | 4VM                                                                                                                                                                       |
|--------------------------------------------------------------------------------------------------------------------------------------------------------------------------------|----------------------------------------------------------------------------------------------------------------------------------------------------------------------------------------------------------------|---------------------------------------------------------------------------------------------------------------------------------------------------------------------------------------------------------------------------------------------------------------------------------------------------------------------------------------------------------------------------------------------|--------------------------------------------------------------------------------------------|---------------------------------------------------------------------------------------------------------------------------------------------------------------------------|
|                                                                                                                                                                                | <i>Level of competence following completion of year 1.</i>                                                                                                                                                     | <i>Level of competence following completion of year 2.</i>                                                                                                                                                                                                                                                                                                                                  | <i>Level of competence following completion of year 3.</i>                                 | <i>Expected level of competence at graduation.</i>                                                                                                                        |
| <p><b>9.1</b><br/>Identify, review, and critically <b>evaluate</b> biomedical literature and apply it to the practice of contemporary, evidence-based veterinary medicine.</p> | <p><b>1A. recognize</b> the principles of evidence-based medicine and describe their importance</p> <p><b>1B. identify</b> a personal knowledge gap and <b>utilize</b> appropriate resources to address it</p> | <p><b>2A. recognize</b> the principles of evidence-based medicine and evaluate a clinical scenario based on them</p> <p><b>2B. formulate</b> a relevant question to address a personal knowledge gap and <b>utilize</b> appropriate resources to address it</p> <p><b>2C. critically appraise</b> the relevant information and published evidence by applying knowledge of study design</p> | <p><b>3A. utilize</b> the principles of evidence-based medicine in a clinical scenario</p> | <p><b>4A. identify, review,</b> and critically <b>evaluate</b> biomedical literature and apply it to the practice of contemporary, evidence-based veterinary medicine</p> |

Examples of session-level/meeting-level/unit-level outcomes to use as a guide to fulfill **NGO 9.1**:

- **recognize** the importance of evidence-based medicine and apply its principles to the practice of veterinary medicine,
- **identify** a knowledge gap, **formulate** a relevant question to address the knowledge gap and **identify** and **utilize** appropriate resources (e.g., PubMed, CAB Abstracts) to address the knowledge gap,
- critically **appraise** the relevant information and published evidence,
- **integrate** and **apply** new knowledge to the practice of veterinary medicine.

**9.2** The graduate will **demonstrate** the skills necessary to maintain life-long learning and the need to pursue professional development in order to maintain competency throughout the duration of their career.

**\*\* This rubric defines competencies for each NGO that students should complete in each year of the curriculum\*\***

| Competency Rubric for each Year of the Curriculum                                                                                                                                                                                               | 1VM                                                                                                                                       | 2VM                                                                                       | 3VM                                                                                                                                                                                                                                | 4VM                                                                                                                                                                                                                                                                    |
|-------------------------------------------------------------------------------------------------------------------------------------------------------------------------------------------------------------------------------------------------|-------------------------------------------------------------------------------------------------------------------------------------------|-------------------------------------------------------------------------------------------|------------------------------------------------------------------------------------------------------------------------------------------------------------------------------------------------------------------------------------|------------------------------------------------------------------------------------------------------------------------------------------------------------------------------------------------------------------------------------------------------------------------|
|                                                                                                                                                                                                                                                 | <i>Level of competence following completion of year 1.</i>                                                                                | <i>Level of competence following completion of year 2.</i>                                | <i>Level of competence following completion of year 3.</i>                                                                                                                                                                         | <i>Expected level of competence at graduation.</i>                                                                                                                                                                                                                     |
| <p><b>9.2</b><br/> <b>Demonstrate</b> the skills necessary to maintain life-long learning and <b>explain</b> the value of pursuing professional development in order to maintain competency throughout the duration of a veterinary career.</p> | <p><b>1A. discuss</b> the variety of career opportunities (in addition to clinical practice) and the requirements for pursuit of each</p> | <p><b>2A. identify</b> available resources to maintain future professional competency</p> | <p><b>3A. reflect</b> on desired career path and the requirements for pursuit of each</p> <p><b>3B. apply</b> previous learning to novel clinical scenarios</p> <p><b>3C. apply</b> new knowledge to common clinical scenarios</p> | <p><b>4A. explain</b> the requirements to obtain and maintain veterinary licensure and accreditation</p> <p><b>4B. describe</b> opportunities to maintain future professional competency</p> <p><b>4C. transfer</b> previous learning to novel clinical situations</p> |

Examples of session-level/meeting-level/unit-level outcomes to use as a guide to fulfill **NGO 9.2**:

- **recognize** the role of basic and applied research to the advancement of veterinary medicine,
- **utilize** the available resources (e.g., TAMU Medical Sciences Library, TAMU Office of Continuing Education) to be able to maintain future professional competency,
- **recognize** the variety of career opportunities, in addition to clinical practice (e.g., public health, industry, government employment),
- **recognize** opportunities to pursue advanced training in specialty areas,
- **recognize** the need to obtain and maintain veterinary licensure and perform the requirements (including continuing education) to obtain and maintain licensure,
- **recognize** the professional obligations of state and federal accreditation and **perform** the requirements to obtain and maintain accreditation.

## NGO 10: Team collaboration, leadership, and practice management

**10.1** The graduate will **operate** effectively with other members of a health care team and the general public.

**\*\* This rubric defines competencies for each NGO that students should complete in each year of the curriculum\*\***

| Competency Rubric for each Year of the Curriculum                                                               | 1VM                                                                                                                    | 2VM                                                                                                                | 3VM                                                                            | 4VM                                                                                           |
|-----------------------------------------------------------------------------------------------------------------|------------------------------------------------------------------------------------------------------------------------|--------------------------------------------------------------------------------------------------------------------|--------------------------------------------------------------------------------|-----------------------------------------------------------------------------------------------|
|                                                                                                                 | <i>Level of competence following completion of year 1.</i>                                                             | <i>Level of competence following completion of year 2.</i>                                                         | <i>Level of competence following completion of year 3.</i>                     | <i>Expected level of competence at graduation.</i>                                            |
| <p><b>10.1</b><br/>Collaborate effectively with other members of a health care team and the general public.</p> | <p><b>1A. collaborate</b> with peers and mentors</p> <p><b>1B. provide</b> balanced, descriptive feedback to peers</p> | <p><b>2A. collaborate</b> with health care team</p> <p><b>2B. utilize</b> feedback to enhance team performance</p> | <p><b>3A. collaborate</b> with health care teams in a professional setting</p> | <p><b>4A. collaborate</b> with other members of a health care team and the general public</p> |

Examples of session-level/meeting-level/unit-level outcomes to use as a guide to fulfill **NGO 10.1**:

- **demonstrate** professional behavior consistently when interacting with other members of the health care team,
- **communicate** with a broad range of people, adjusting their language according to the level of education or experience of the audience,
- **evaluate** other members of the health care team and provide appropriate feedback to ensure professional behavior with clients and colleagues,
- **demonstrate** confidentiality when handling knowledge and information about others in the professional setting.

**10.2** The graduate will **organize** their own professional activities and **manage** other members of the healthcare team in order to provide optimal patient care.

**\*\* This rubric defines competencies for each NGO that students should complete in each year of the curriculum\*\***

| Competency Rubric for each Year of the Curriculum                                                                                                 | 1VM                                                                                                                                                                                                                                                                                              | 2VM                                                                                      | 3VM                                                                                                                                                       | 4VM                                                                                                               |
|---------------------------------------------------------------------------------------------------------------------------------------------------|--------------------------------------------------------------------------------------------------------------------------------------------------------------------------------------------------------------------------------------------------------------------------------------------------|------------------------------------------------------------------------------------------|-----------------------------------------------------------------------------------------------------------------------------------------------------------|-------------------------------------------------------------------------------------------------------------------|
|                                                                                                                                                   | <i>Level of competence following completion of year 1.</i>                                                                                                                                                                                                                                       | <i>Level of competence following completion of year 2.</i>                               | <i>Level of competence following completion of year 3.</i>                                                                                                | <i>Expected level of competence at graduation.</i>                                                                |
| <p><b>10.2</b><br/>Organize professional activities and manage other members of the healthcare team in order to provide optimal patient care.</p> | <p><b>1A. demonstrate</b> organizational skills in an academic setting to enhance personal performance</p> <p><b>1B. explain</b> the leadership opportunities and responsibilities of veterinarians in society</p> <p><b>1C. identify</b> leadership qualities that enhance team performance</p> | <p><b>2A. develop</b> a personal plan to strengthen leadership and management skills</p> | <p><b>3A. demonstrate</b> organizational skills in a professional setting</p> <p><b>3B. lead</b> members of the healthcare team in clinical scenarios</p> | <p><b>4A. lead</b> members of the healthcare team to provide optimal patient care in the professional setting</p> |

Examples of session-level/meeting-level/unit-level outcomes to use as a guide to fulfill **NGO 10.2**:

- **explain** the value of leadership to the veterinary profession and **describe** some attributes common to effective leaders,
- **demonstrate** leadership skills, including organizing oneself and others, in order to appropriately manage a patient,
- **appraise** their leadership strengths and weaknesses and **identify** experiences to broaden their own professional development,
- **explain** the unique leadership opportunities and responsibilities of veterinarians with regard to patients, clients, and society,
- **explain** the importance of organized veterinary medicine to the profession.

**10.3** The graduate will **apply** the principles of practice management to the running of a veterinary practice as a business.

**\*\* This rubric defines competencies for each NGO that students should complete in each year of the curriculum\*\***

| Competency Rubric for each Year of the Curriculum                              | 1VM                                                                                                                       | 2VM                                                                                                                      | 3VM                                                                            | 4VM                                                                            |
|--------------------------------------------------------------------------------|---------------------------------------------------------------------------------------------------------------------------|--------------------------------------------------------------------------------------------------------------------------|--------------------------------------------------------------------------------|--------------------------------------------------------------------------------|
|                                                                                | <i>Level of competence following completion of year 1.</i>                                                                | <i>Level of competence following completion of year 2.</i>                                                               | <i>Level of competence following completion of year 3.</i>                     | <i>Expected level of competence at graduation.</i>                             |
| <p><b>10.3</b><br/>Apply the principles of veterinary practice management.</p> | <p><b>1A. explain</b> the fundamental elements of practice management and its importance to high quality patient care</p> | <p><b>2A. identify</b> strategies to apply the fundamental elements of practice management in a professional setting</p> | <p><b>3A. develop</b> a practice management plan within clinical scenarios</p> | <p><b>4A. demonstrate</b> the principles of veterinary practice management</p> |

Examples of session-level/meeting-level/unit-level outcomes to use as a guide to fulfill **NGO 10.3**:

- **recognize** the importance of managing personal finances and the impact that lifestyle choices have on student debt load,
- **prepare** a personal budget through which to manage their finances,
- **explain** the basic veterinary business performance functions,
- **explain** the pros and cons of different business designs, including sole proprietorship, partnerships, corporation, and limited liability company,
- **identify** the major components of business overhead,
- **explain** the role of personal and business insurance (e.g., health insurance, disability insurance, workers' compensation, and malpractice insurance) in safeguarding financial assets,
- **explain** the fundamental elements required to provide high-quality customer service to clients,
- **describe** the selection criteria for the ideal veterinary associate,
- **identify** their professional priorities and needs and use this information to negotiate a career opportunity and/or adjust their budget,
- **analyze** a business plan to determine the break-even point for new equipment or other financial investments within their practice.

## NGO 11: Multicultural awareness and personal wellness

**11.1** The graduate will **demonstrate** sensitivity to people who are different from them and interact with others free of discrimination in professional settings.

**\*\* This rubric defines competencies for each NGO that students should complete in each year of the curriculum\*\***

| Competency Rubric for each Year of the Curriculum                                                                                                 | 1VM                                                                                                                                                                                                     | 2VM                                                                                                                                                    | 3VM                                                                                                                                                                                                    | 4VM                                                                                                                                                                                       |
|---------------------------------------------------------------------------------------------------------------------------------------------------|---------------------------------------------------------------------------------------------------------------------------------------------------------------------------------------------------------|--------------------------------------------------------------------------------------------------------------------------------------------------------|--------------------------------------------------------------------------------------------------------------------------------------------------------------------------------------------------------|-------------------------------------------------------------------------------------------------------------------------------------------------------------------------------------------|
|                                                                                                                                                   | <i>Level of competence following completion of year 1.</i>                                                                                                                                              | <i>Level of competence following completion of year 2.</i>                                                                                             | <i>Level of competence following completion of year 3.</i>                                                                                                                                             | <i>Expected level of competence at graduation.</i>                                                                                                                                        |
| <p><b>11.1</b><br/><b>Demonstrate</b> sensitivity to diverse groups and interact free of discrimination with others in professional settings.</p> | <p><b>1A. describe</b> common forms of bias or discrimination that might occur in a professional setting</p> <p><b>1B. define</b> diversity and <b>list</b> major categories in which people differ</p> | <p><b>2A. recognize</b> bias or discrimination in professional settings</p> <p><b>2B. explain</b> the value of diversity in a professional setting</p> | <p><b>3A. describe</b> potential corrective actions to mitigate bias or discrimination in a professional setting</p> <p><b>3B. collaborate</b> with a diverse population in a professional setting</p> | <p><b>4A. implement</b> corrective actions to mitigate bias or discrimination in a professional setting</p> <p><b>4B. collaborate</b> with a diverse population in a clinical setting</p> |

Examples of session-level/meeting-level/unit-level outcomes to use as a guide to fulfill **NGO 11.1**:

- **define** the term diversity and list the major categories in which people differ from one another,
- **explain** the value of diversity and inclusiveness and its benefits to the veterinary profession,
- **explain** how the categories of diversity may influence thoughts and actions,
- **describe** their own story and explain how their own background and characteristics may influence their thoughts and actions,
- **recognize** the potential for bias and discrimination in the thoughts and actions in their professional life,
- **implement** corrective actions to reduce bias and discrimination towards people who are different from them,
- **apply** their understanding of diversity to professional decision-making,
- **recognize** bias and discrimination that exist in the professional organizations and entities in which they work.



**11.2** The graduate will **develop** a capacity for effectively managing their own personal, physical, emotional, and financial needs in order to sustain high quality patient care and professional satisfaction throughout the duration of their career.

**\*\* This rubric defines competencies for each NGO that students should complete in each year of the curriculum \*\***

| Competency Rubric for each Year of the Curriculum                                                                                                                                                  | 1VM                                                                                                                                                                                                                                                                                                                                                                       | 2VM                                                                                                                                                                                                                                                                                                                                                             | 3VM                                                                                                                                                                                                                                                                                                                                                                                               | 4VM                                                                                                                                                                                  |
|----------------------------------------------------------------------------------------------------------------------------------------------------------------------------------------------------|---------------------------------------------------------------------------------------------------------------------------------------------------------------------------------------------------------------------------------------------------------------------------------------------------------------------------------------------------------------------------|-----------------------------------------------------------------------------------------------------------------------------------------------------------------------------------------------------------------------------------------------------------------------------------------------------------------------------------------------------------------|---------------------------------------------------------------------------------------------------------------------------------------------------------------------------------------------------------------------------------------------------------------------------------------------------------------------------------------------------------------------------------------------------|--------------------------------------------------------------------------------------------------------------------------------------------------------------------------------------|
|                                                                                                                                                                                                    | <i>Level of competence following completion of year 1.</i>                                                                                                                                                                                                                                                                                                                | <i>Level of competence following completion of year 2.</i>                                                                                                                                                                                                                                                                                                      | <i>Level of competence following completion of year 3.</i>                                                                                                                                                                                                                                                                                                                                        | <i>Expected level of competence at graduation.</i>                                                                                                                                   |
| <p><b>11.2</b><br/> <b>Develop</b> a plan for managing physical, emotional, and financial needs to sustain professional competence and personal satisfaction for the duration of one's career.</p> | <p><b>1A. explain</b> where to locate resources to manage wellness (e.g., counseling services, financial advisors)</p> <p><b>1B. recognize</b> when personal, physical, emotional, or financial needs are impaired, and <b>identify</b> steps to seek support</p> <p><b>1C. describe</b> strategies to maintain personal, physical, emotional, and financial wellness</p> | <p><b>2A. describe</b> risk factors in the profession for various types of impairments including mental illness</p> <p><b>2B. explain</b> the impact of impairment on patient care and professional satisfaction</p> <p><b>2C. recognize</b> when personal, physical, emotional, or financial needs are impaired, and <b>identify</b> steps to seek support</p> | <p><b>3A. explain</b> where to locate resources to manage wellness after graduation</p> <p><b>3B. recognize</b> when impaired physical, emotional, or financial needs are detrimentally affecting professional competence and personal satisfaction, and recognize corrective actions</p> <p><b>3C. describe</b> strategies to maintain personal, physical, emotional, and financial wellness</p> | <p><b>4A. develop</b> a plan for managing physical, emotional, and financial needs to sustain professional competence and personal satisfaction for the duration of one's career</p> |

Examples of session-level/meeting-level/unit-level outcomes to use as a guide to fulfill **NGO 11.2**:

- **describe** the components of personal, physical, emotional and financial wellness,
- **explain** the role that personal, physical, emotional and financial wellness plays in maintaining high quality patient care and professional satisfaction,
- **explain** the unique professional circumstances of the veterinary profession that increase risk factors for impairment and/or mental illness (e.g., emotional burnout, compassion fatigue, access to controlled substances),
- **develop** a long-term plan to maintain personal, physical, emotional and financial wellness throughout their career,
- **recognize** when they have a personal, physical, emotional, or financial need,
- **develop** short- and long-term plans to address their needs, including recognition of sources of assistance,
- **recognize** when they or someone they work with is impaired or mentally ill and requires assistance and **explain** the appropriate steps in seeking the necessary support or help.

## NGO 12: Legal and regulatory compliance

**12.1** The graduate will **recognize** the legal responsibilities of the veterinarian in relation to patients, clients, society, and the environment and **operate** within these professional parameters.

**\*\* This rubric defines competencies for each NGO that students should complete in each year of the curriculum \*\***

| Competency Rubric for each Year of the Curriculum                                                                                                                                                               | 1VM                                                                                                                                      | 2VM                                                                                                                                                                                                                                                                                                               | 3VM                                                                                                                                                                                                                                                                                                                                                                      | 4VM                                                                                                                                                                                                                                           |
|-----------------------------------------------------------------------------------------------------------------------------------------------------------------------------------------------------------------|------------------------------------------------------------------------------------------------------------------------------------------|-------------------------------------------------------------------------------------------------------------------------------------------------------------------------------------------------------------------------------------------------------------------------------------------------------------------|--------------------------------------------------------------------------------------------------------------------------------------------------------------------------------------------------------------------------------------------------------------------------------------------------------------------------------------------------------------------------|-----------------------------------------------------------------------------------------------------------------------------------------------------------------------------------------------------------------------------------------------|
|                                                                                                                                                                                                                 | <i>Level of competence following completion of year 1.</i>                                                                               | <i>Level of competence following completion of year 2.</i>                                                                                                                                                                                                                                                        | <i>Level of competence following completion of year 3.</i>                                                                                                                                                                                                                                                                                                               | <i>Expected level of competence at graduation.</i>                                                                                                                                                                                            |
| <p><b>12.1</b><br/> <b>Recognize</b> the legal responsibilities of the veterinarian in relation to patients, clients, society, and the environment and <b>operate</b> within these professional parameters.</p> | <p><b>1A. describe</b> the legal responsibilities of the veterinarian in relation to patients, clients, society, and the environment</p> | <p><b>2A. recognize</b> the legal responsibilities of the veterinarian in relation to patients, clients, society, and the environment in a clinical scenario</p> <p><b>2B. identify</b> local and federal diseases of regulatory importance and <b>describe</b> how to report them to appropriate authorities</p> | <p><b>3A. describe</b> compliance with legal regulations and <b>recognize</b> incidents of noncompliance</p> <p><b>3B. identify</b> local and federal diseases of regulatory importance and <b>report</b> them to appropriate authorities in a clinical scenario</p> <p><b>3C. communicate</b> to clients the importance of legal regulations in a clinical scenario</p> | <p><b>4A. demonstrate</b> compliance with legal regulations and <b>describe</b> how to appropriately manage incidents of noncompliance</p> <p><b>4B. communicate</b> to clients the importance of legal regulations in a clinical setting</p> |

Examples of session-level/meeting-level/unit-level outcomes to use as a guide to fulfill **NGO 12.1**:

- **explain** the role of OSHA in regulating veterinary practices to ensure workplace safety (e.g., infectious, chemical and physical) for all employees,
- **demonstrate** compliance with OSHA regulations and **recognize** and **describe** how to appropriately manage incidents of noncompliance within a practice,
- **recognize** the need to obtain and maintain valid licensure for handling controlled substances,
- **complete** and **submit** health certificates and other regulatory forms according to the state and federal rules,
- **identify** the clinical signs, clinical course, transmission potential (including vectors), and pathogen associated with transboundary animal diseases,
- **identify** local and federal diseases of regulatory importance, including emerging and transboundary diseases, and report them to appropriate authorities (e.g., USDA, state animal health commission, and department of state health services),
- **describe** which drugs and uses of drugs are legal and illegal for use in Texas and the United States in common domestic species,<sup>1</sup>
- **describe** the sources that can be used to determine if a drug is legal for use in common domestic species at the state and federal levels,<sup>1</sup>
- read and **interpret** a drug label and apply the information to make a legal and clinically-appropriate drug decision,
- **explain** the process used to report adverse drug and vaccine reactions to the appropriate regulatory agency (e.g., EPA, USDA, FDA).

## NGO 13: Animal welfare

**13.1** The graduate will **apply** the principles of animal welfare for the protection of animals through the prevention and relief of suffering and the humane and responsible management according to established codes of practice.

**\*\* This rubric defines competencies for each NGO that students should complete in each year of the curriculum\*\***

| Competency Rubric for each Year of the Curriculum                                                                                                                                                                                | 1VM                                                                                                                                                         | 2VM                                                                                                                                                                                                                                                                                        | 3VM                                                                                                                                                                      | 4VM                                                                                                                                                                                                                                                                                                                           |
|----------------------------------------------------------------------------------------------------------------------------------------------------------------------------------------------------------------------------------|-------------------------------------------------------------------------------------------------------------------------------------------------------------|--------------------------------------------------------------------------------------------------------------------------------------------------------------------------------------------------------------------------------------------------------------------------------------------|--------------------------------------------------------------------------------------------------------------------------------------------------------------------------|-------------------------------------------------------------------------------------------------------------------------------------------------------------------------------------------------------------------------------------------------------------------------------------------------------------------------------|
|                                                                                                                                                                                                                                  | <i>Level of competence following completion of year 1.</i>                                                                                                  | <i>Level of competence following completion of year 2.</i>                                                                                                                                                                                                                                 | <i>Level of competence following completion of year 3.</i>                                                                                                               | <i>Expected level of competence at graduation.</i>                                                                                                                                                                                                                                                                            |
| <p><b>13.1</b><br/>Apply the principles of animal welfare for the protection of animals through the prevention and relief of suffering and the humane and responsible management according to established codes of practice.</p> | <p><b>1A. discuss</b> the principals of animal welfare to the use of animals in teaching/research</p> <p><b>1B. define</b> principles of animal welfare</p> | <p><b>2A. recognize</b> the signs of animal neglect and cruelty</p> <p><b>2B. communicate</b> principles of animal welfare to clients, healthcare team, and society in clinical scenarios</p> <p><b>2C. discuss</b> the principles of animal welfare to the use of animals in research</p> | <p><b>3A. explain</b> the legal and ethical responsibilities of the veterinarian with regard to animal welfare in a clinical scenario, research setting, and society</p> | <p><b>4A. apply</b> the principles of animal welfare for clinical patients and research animals</p> <p><b>4B. explain</b> the legal and ethical responsibilities of the veterinarian with regard to animal welfare</p> <p><b>4C. communicate</b> principles of animal welfare to clients, healthcare team, general public</p> |

Examples of session-level/meeting-level/unit-level outcomes to use as a guide to fulfill **NGO 13.1**:

- **describe** the role of the veterinarian in promoting the human-animal bond and **communicate** the importance of this relationship,
- **describe** common management systems for common domestic species and compare the advantages and disadvantages of each,
- **communicate** effectively to a client how to properly care for their animal and how to identify accurate sources of information,
- **recognize** the signs of animal neglect and cruelty and **recognize** the characteristics of animal hoarders and abusers and **explain** the legal and ethical responsibilities of the veterinarian in the identification, investigation, and prosecution of these cases,
- **describe** the Five Freedoms and their relevance to modern animal care,
- **discuss** the guiding principles for the ethical use of animals in research,
- **describe** the varying principles on animal rights,

- describe environmental enrichment techniques for pets, livestock, laboratory animals, and zoo animals.

**13.2** The graduate will apply animal restraint and handling techniques to safely and humanely work with patients and support clients and other members of the health care team.

**\*\* This rubric defines competencies for each NGO that students should complete in each year of the curriculum\*\***

| Competency Rubric for each Year of the Curriculum                                                                                                                             | 1VM                                                                                                                                                       | 2VM                                                                   | 3VM                                                                                                                                                                                                | 4VM                                                                                                                                                                     |
|-------------------------------------------------------------------------------------------------------------------------------------------------------------------------------|-----------------------------------------------------------------------------------------------------------------------------------------------------------|-----------------------------------------------------------------------|----------------------------------------------------------------------------------------------------------------------------------------------------------------------------------------------------|-------------------------------------------------------------------------------------------------------------------------------------------------------------------------|
|                                                                                                                                                                               | <i>Level of competence following completion of year 1.</i>                                                                                                | <i>Level of competence following completion of year 2.</i>            | <i>Level of competence following completion of year 3.</i>                                                                                                                                         | <i>Expected level of competence at graduation.</i>                                                                                                                      |
| <p><b>13.2</b><br/>Apply animal restraint and handling techniques to safely and humanely work with patients and assist clients and other members of the health care team.</p> | <p><b>1A. describe</b> methods of patient restraint for common domestic species</p> <p><b>1B. perform</b> restraint techniques safely and effectively</p> | <p><b>2A. perform</b> restraint techniques safely and effectively</p> | <p><b>3A. select</b> an appropriate restraint technique based upon the animal and situation</p> <p><b>3B. perform</b> animal restraint techniques safely and effectively in clinical scenarios</p> | <p><b>4A. apply</b> animal restraint and handling techniques to safely and humanely work with patients and assist clients and other members of the health care team</p> |

Examples of session-level/meeting-level/unit-level outcomes to use as a guide to fulfill **NGO 13.2**:

- describe common methods of patient restraint for common domestic species,
- select an appropriate restraint technique based upon the animal and situation (e.g., disease state, clinical signs, animal compliance, environment, medical or surgical procedure, etc.),
- perform all widely accepted animal restraint techniques safely and effectively on all common domestic species,
- describe the precepts of animal welfare and explain how animal welfare relates to animal restraint,
- apply knowledge of animal behavior to ensure patient safety and the safety of the health care team during animal restraint.

**13.3 Determine** when euthanasia is an appropriate option for a patient or population, effectively **communicate** the option with owners, and **describe** how to perform euthanasia safely, effectively and humanely

**\*\* This rubric defines competencies for each NGO that students should complete in each year of the curriculum\*\***

| Competency Rubric for each Year of the Curriculum                                                                                                                                                                     | 1VM                                                        | 2VM                                                                                                                                                                                                    | 3VM                                                                                                                                                                                                                                                                                                                                       | 4VM                                                                                                                                                                                          |
|-----------------------------------------------------------------------------------------------------------------------------------------------------------------------------------------------------------------------|------------------------------------------------------------|--------------------------------------------------------------------------------------------------------------------------------------------------------------------------------------------------------|-------------------------------------------------------------------------------------------------------------------------------------------------------------------------------------------------------------------------------------------------------------------------------------------------------------------------------------------|----------------------------------------------------------------------------------------------------------------------------------------------------------------------------------------------|
|                                                                                                                                                                                                                       | <i>Level of competence following completion of year 1.</i> | <i>Level of competence following completion of year 2.</i>                                                                                                                                             | <i>Level of competence following completion of year 3.</i>                                                                                                                                                                                                                                                                                | <i>Expected level of competence at graduation.</i>                                                                                                                                           |
| <p><b>13.3</b><br/> <b>Determine</b> when euthanasia is an appropriate option for a patient, or population. Effectively <b>communicate</b> the option with owners, and <b>describe</b> how to perform euthanasia.</p> |                                                            | <p><b>2A. describe</b> ethical methods of euthanasia</p> <p><b>2B. identify</b> resources available for clients regarding euthanasia</p> <p><b>2C. explain</b> AVMA-approved methods of euthanasia</p> | <p><b>3A. perform</b> euthanasia techniques for common domestic species in a clinical scenario</p> <p><b>3B. create</b> criteria to assist clients when electing euthanasia to alleviate suffering</p> <p><b>3C. provide</b> appropriate support to clients before, during, and after euthanasia of the animal in a clinical scenario</p> | <p><b>4A. select</b> appropriate euthanasia technique for a clinical patient</p> <p><b>4B. provide</b> appropriate support to clients before, during, and after euthanasia of the animal</p> |

Examples of session-level/meeting-level/unit-level outcomes to use as a guide to fulfill **NGO 13.3**:

- **create** a set of criteria that can help a client decide when it is appropriate to euthanize an animal to alleviate its suffering,
- **perform** euthanasia on all common domestic species safely, effectively, and humanely,
- **locate** and **utilize** the AVMA Guidelines for Euthanasia,
- **recognize** the various expressions of human grief and be able to effectively mediate client reactions during euthanasia,
- **provide** appropriate support to clients before, during, and after euthanasia of the animal.
